# Supplementary material for: Diastereoselective synthesis of α-dicarbonyl cyclopropanes via a lanthanide amide-catalysed reaction
Source: Royal Society of Chemistry journal article supplement (doi:10.1039/c9ob00732f), 2019-01-01
Supplement: c9ob00732f1.pdf [file c9ob00732f1.pdf]

**Diastereoselective synthesis of  $\alpha$ -dicarbonyl cyclopropanes  
via a lanthanide amide-catalysed reaction**

Wenxi Sun, Cheng Peng, Zhigang Yao, Fan Xu\*

Key Laboratory of Organic Synthesis,  
College of Chemistry, Chemical Engineering and Materials Science,  
Soochow University, Suzhou 215123, P. R. China

xufan@suda.edu.cn

**SUPPLEMENTARY INFORMATION**

**TABLE OF CONTENTS**

|                                                                                       |     |
|---------------------------------------------------------------------------------------|-----|
| Copies of $^1\text{H}$ NMR, $^{13}\text{C}$ NMR, and $^{19}\text{F}$ NMR Spectra..... | S2  |
| Results of control experiments conducted at 120 °C and 180 °C.....                    | S32 |

Copies of  $^1\text{H}$  NMR,  $^{13}\text{C}$  NMR, and  $^{19}\text{F}$  NMR Spectra

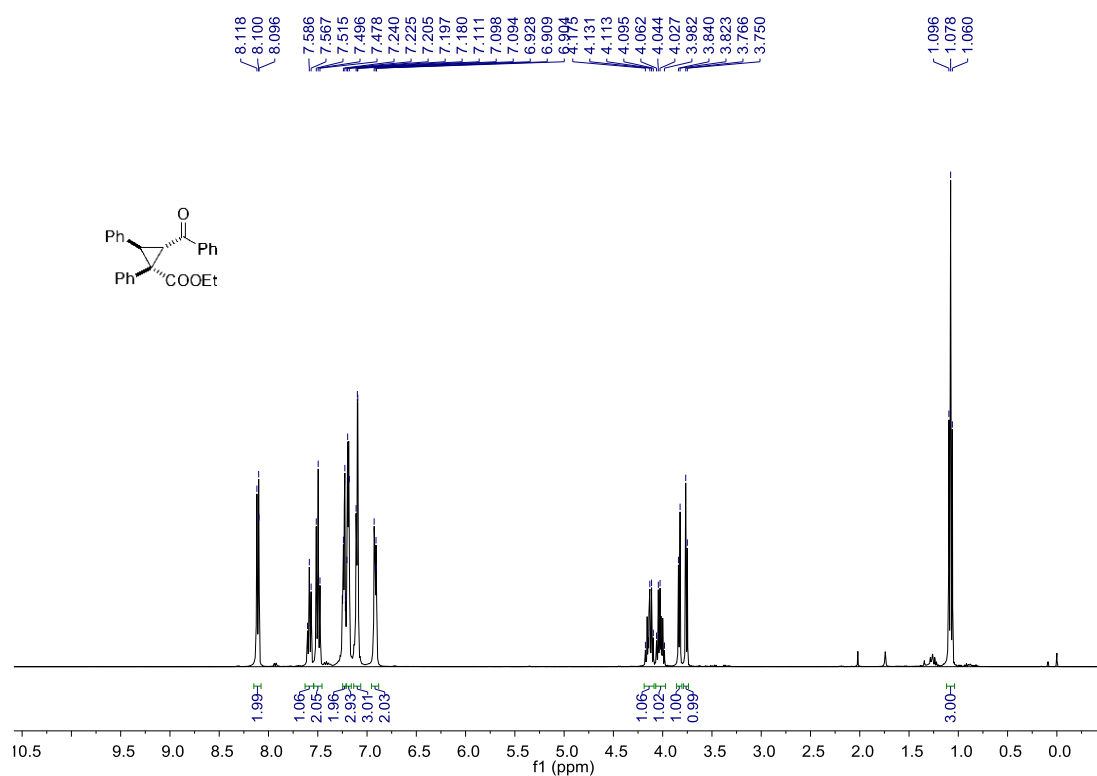

$^1\text{H}$  NMR spectrum of **6aa** (400 MHz,  $\text{CDCl}_3$ )

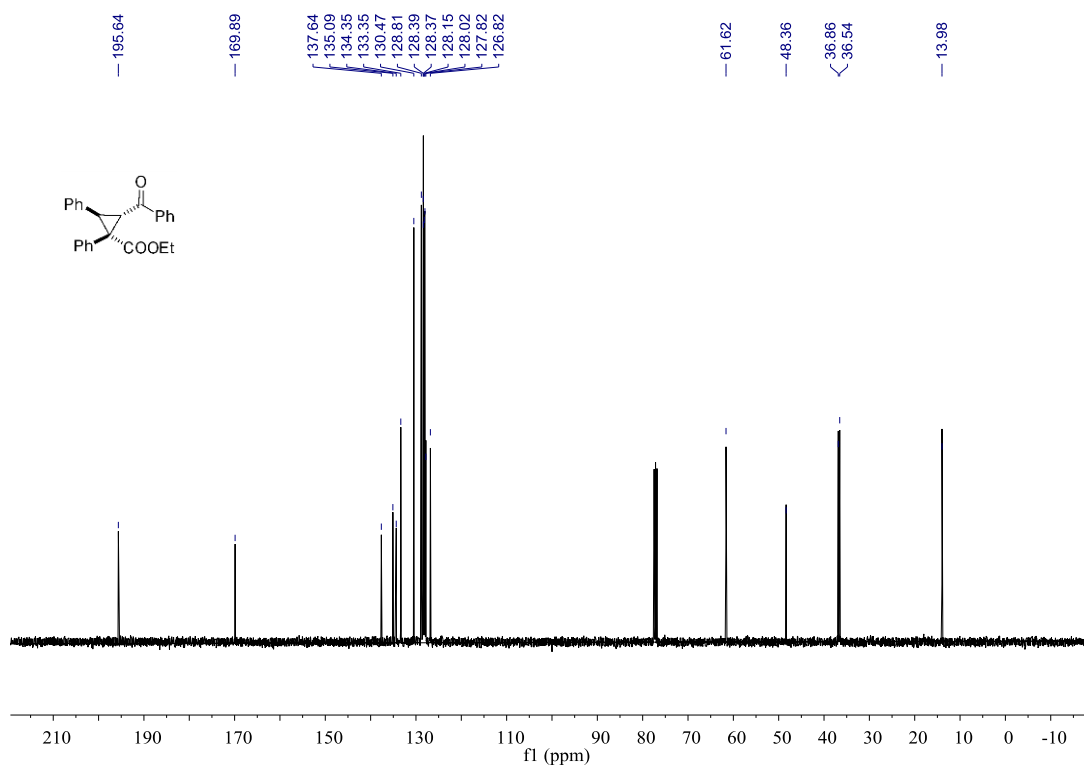

$^{13}\text{C}$  NMR spectrum of **6aa** (100 MHz,  $\text{CDCl}_3$ )

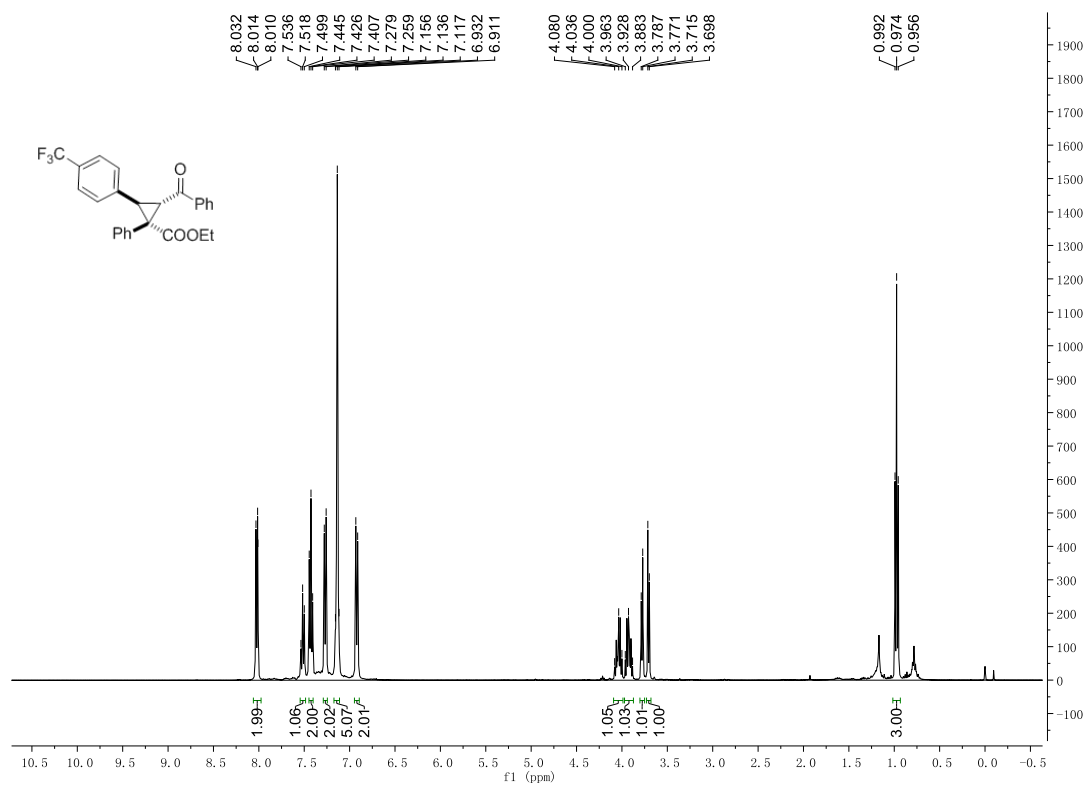

**<sup>1</sup>H NMR spectrum of **6ab** (400 MHz, CDCl<sub>3</sub>)**

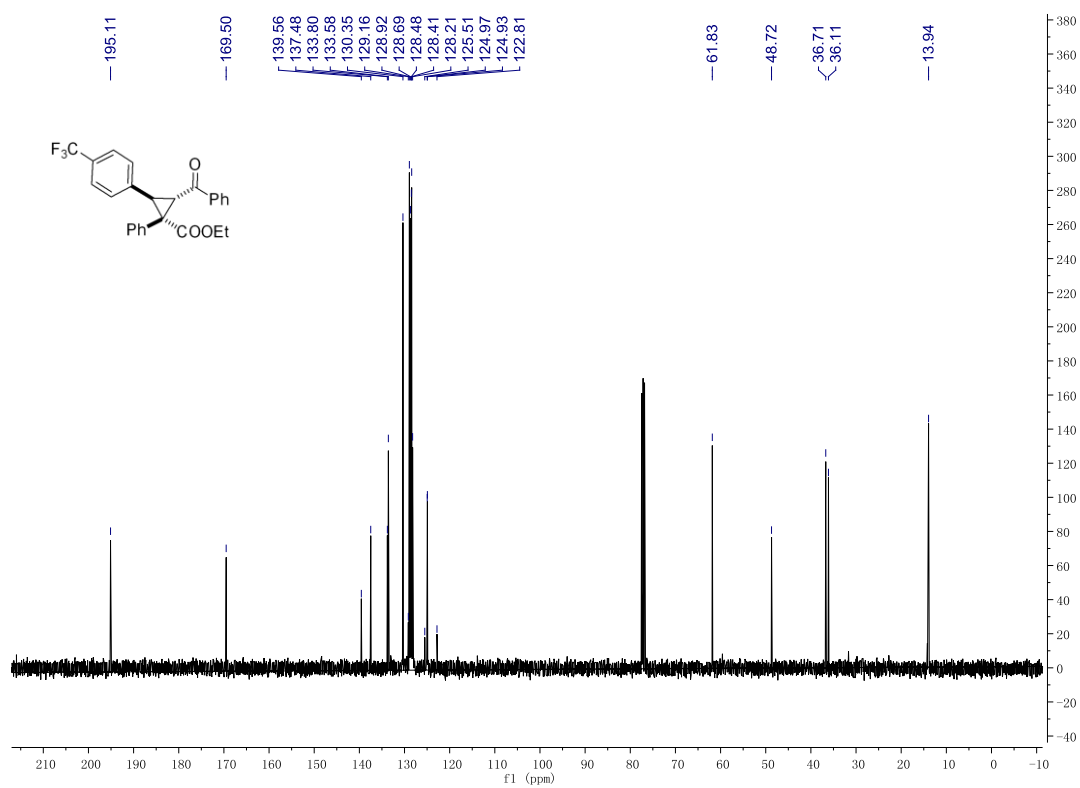

**<sup>13</sup>C NMR spectrum of **6ab** (100 MHz, CDCl<sub>3</sub>)**

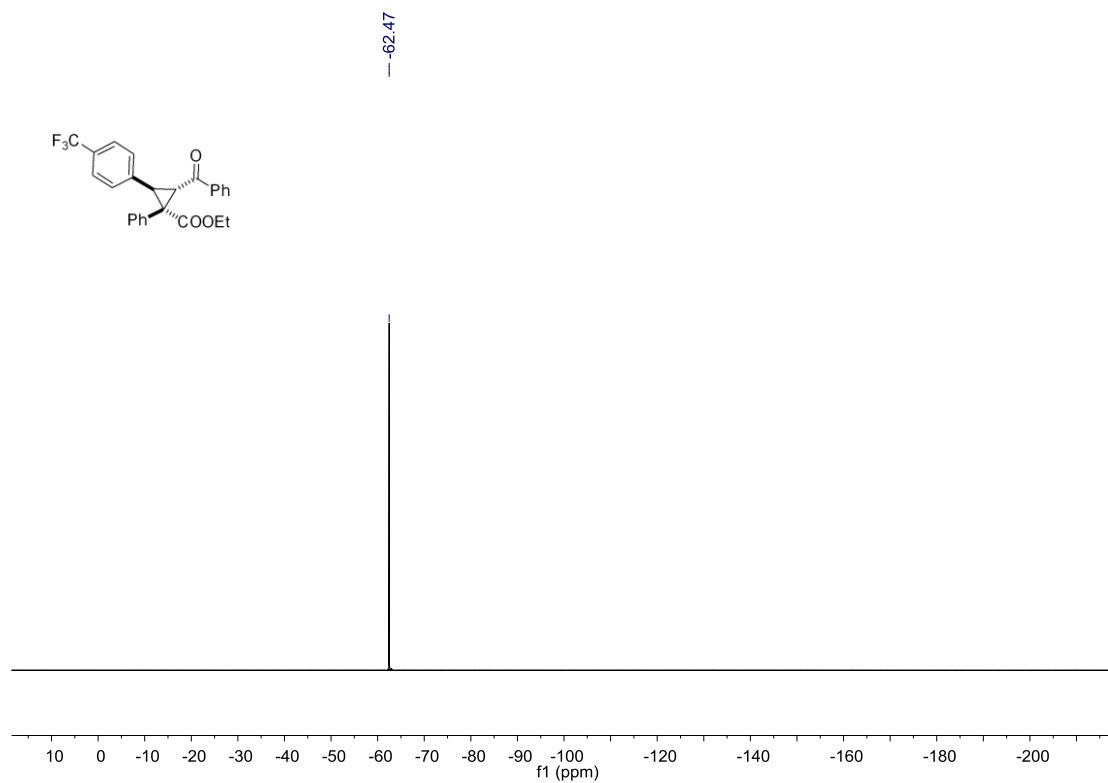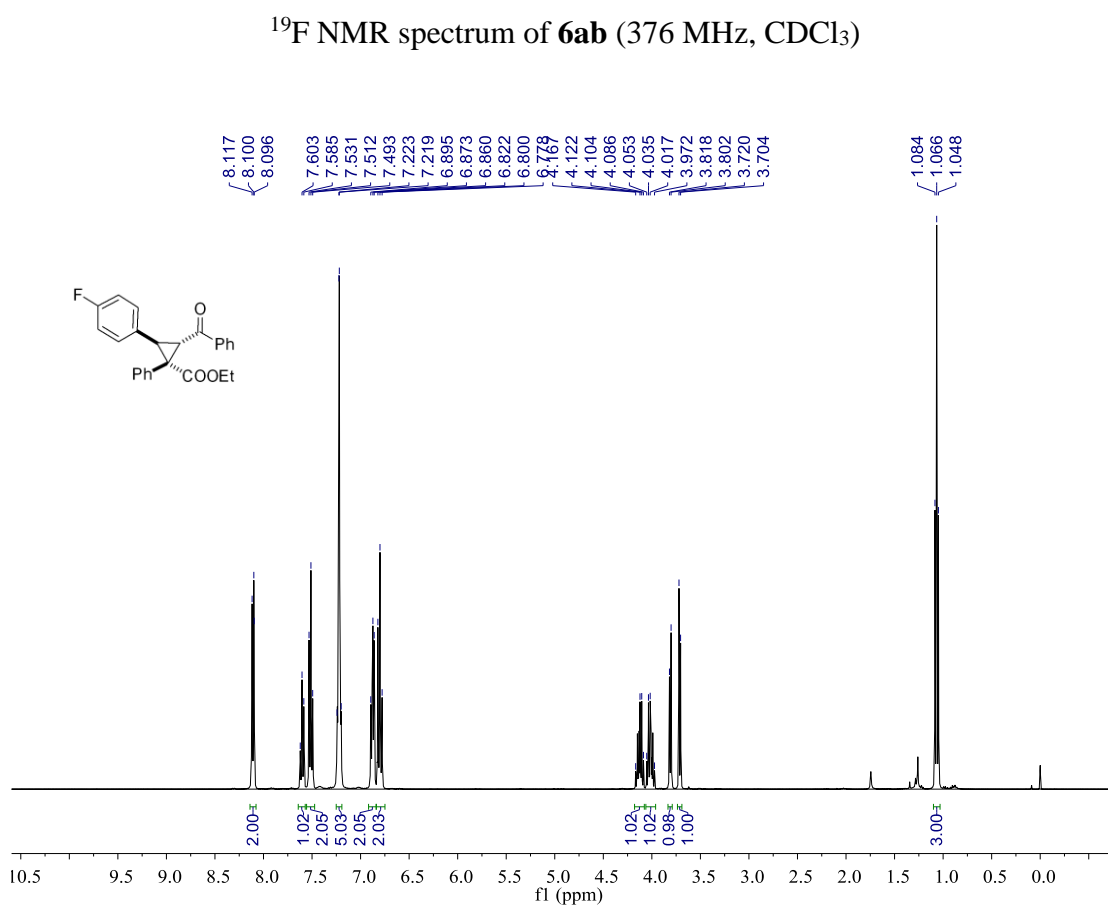

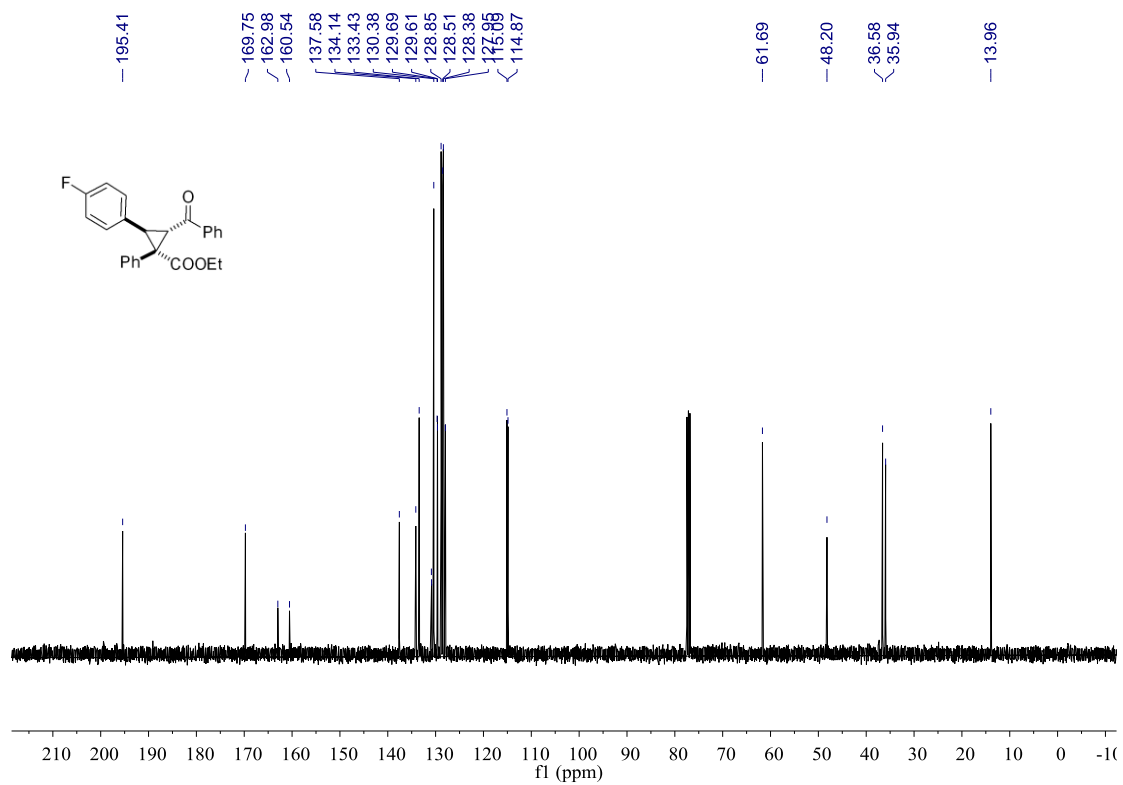

$^{13}\text{C}$  NMR spectrum of **6ac** (100 MHz,  $\text{CDCl}_3$ )

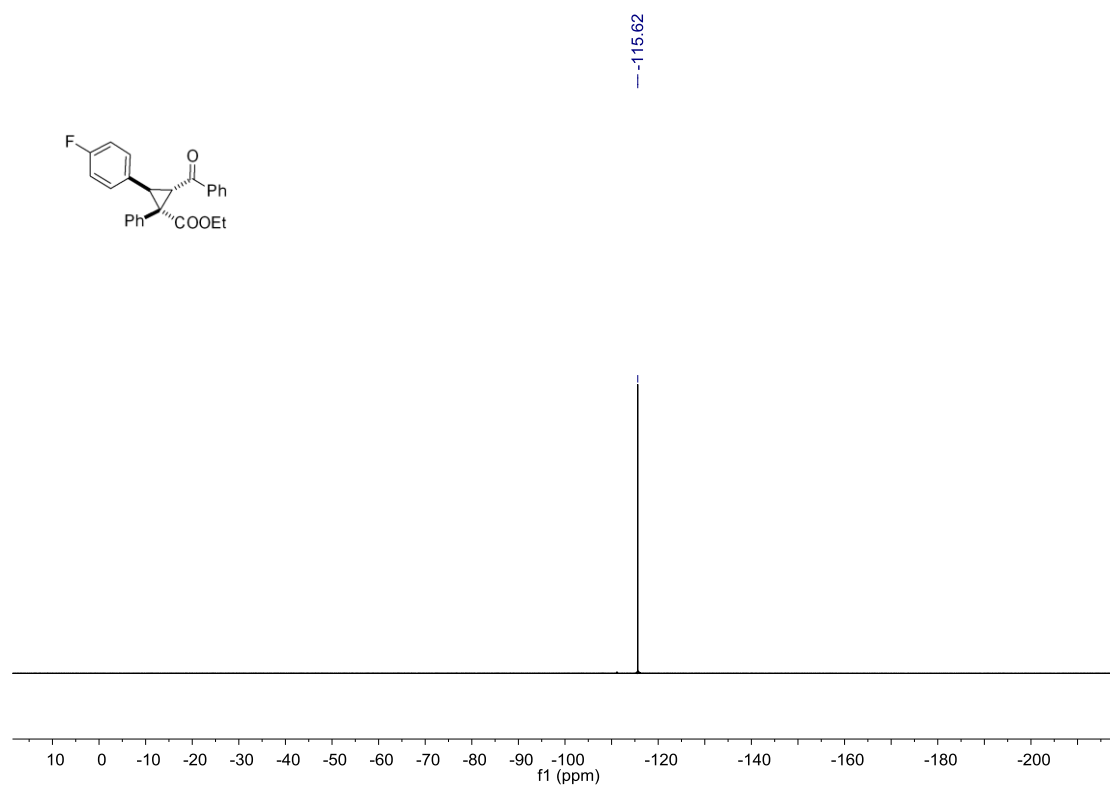

$^{19}\text{F}$  NMR spectrum of **6ac** (376 MHz,  $\text{CDCl}_3$ )

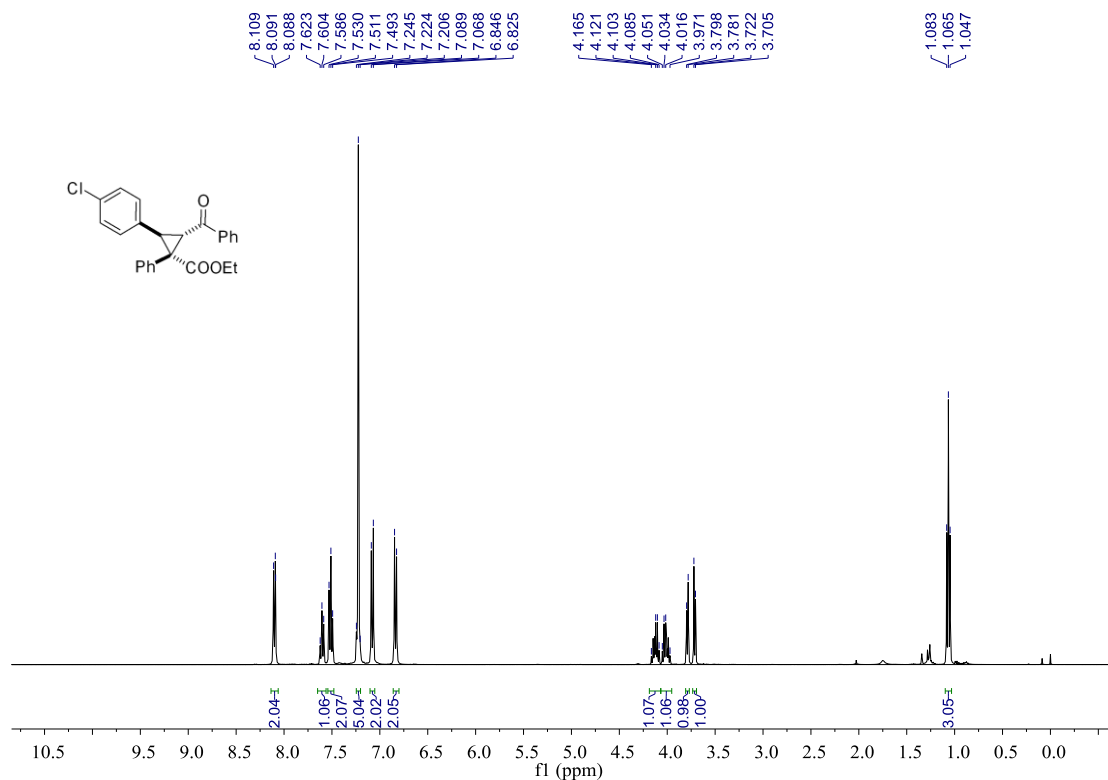

<sup>1</sup>H NMR spectrum of **6ad** (400 MHz, CDCl<sub>3</sub>)

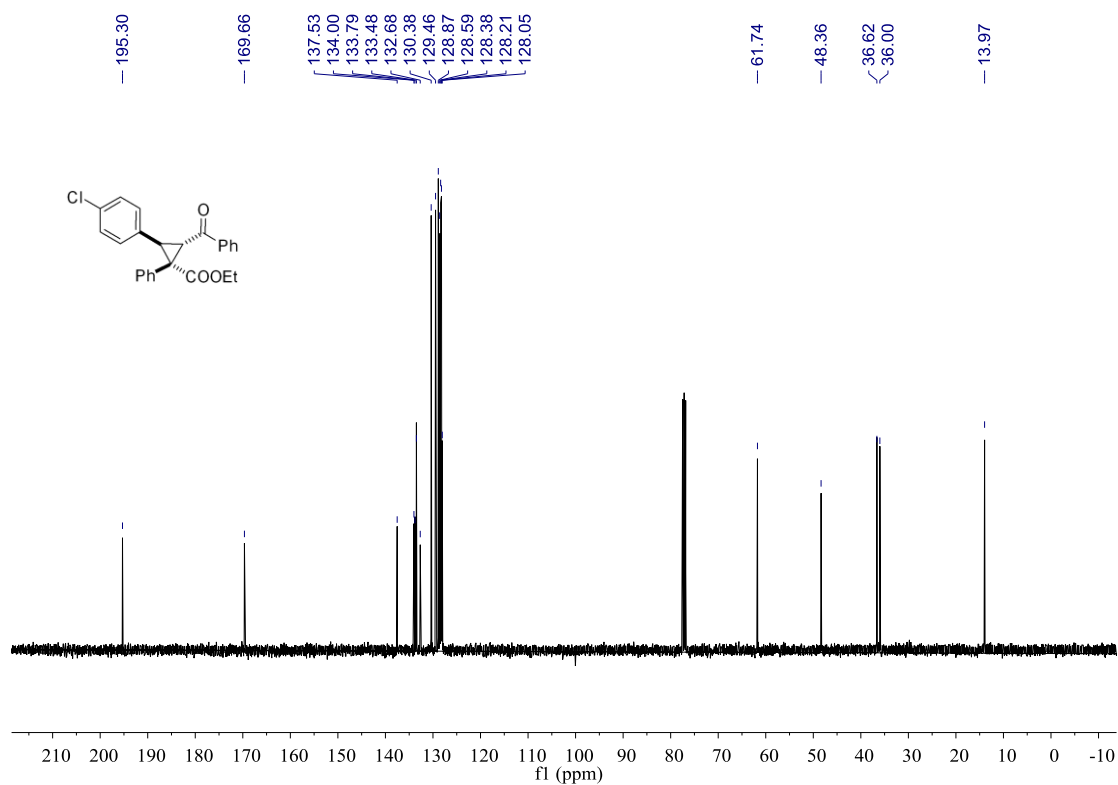

<sup>13</sup>C NMR spectrum of **6ad** (100 MHz, CDCl<sub>3</sub>)

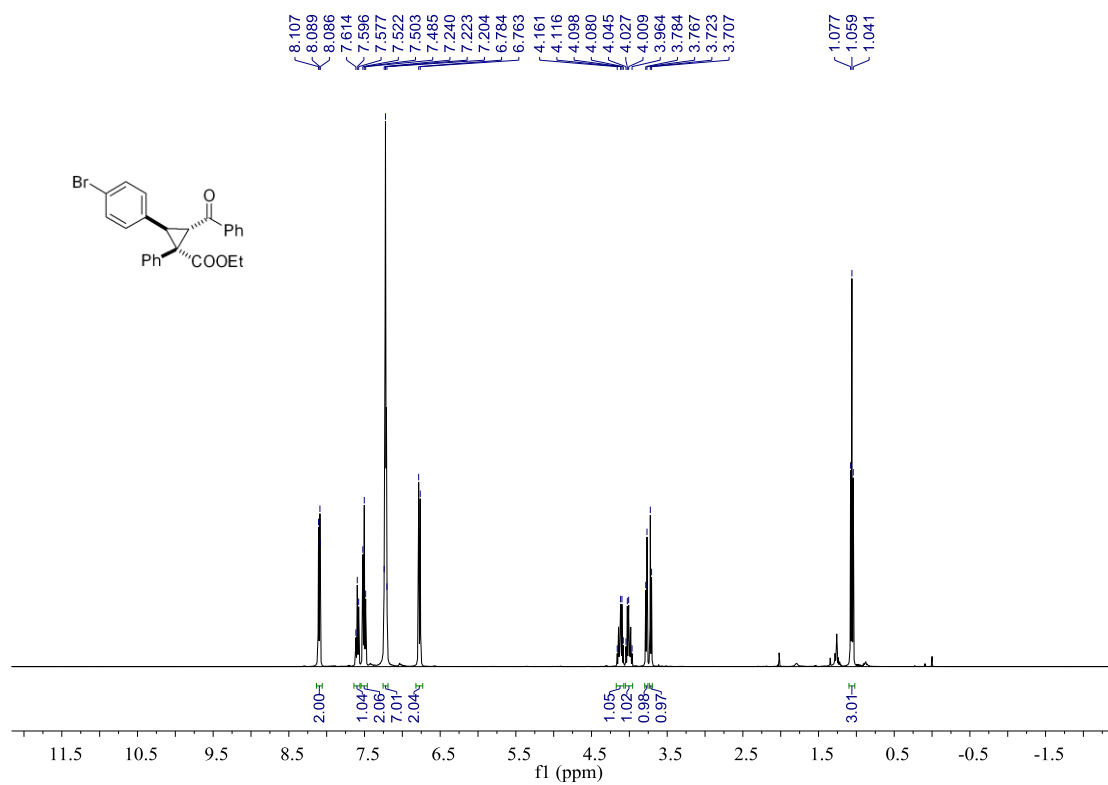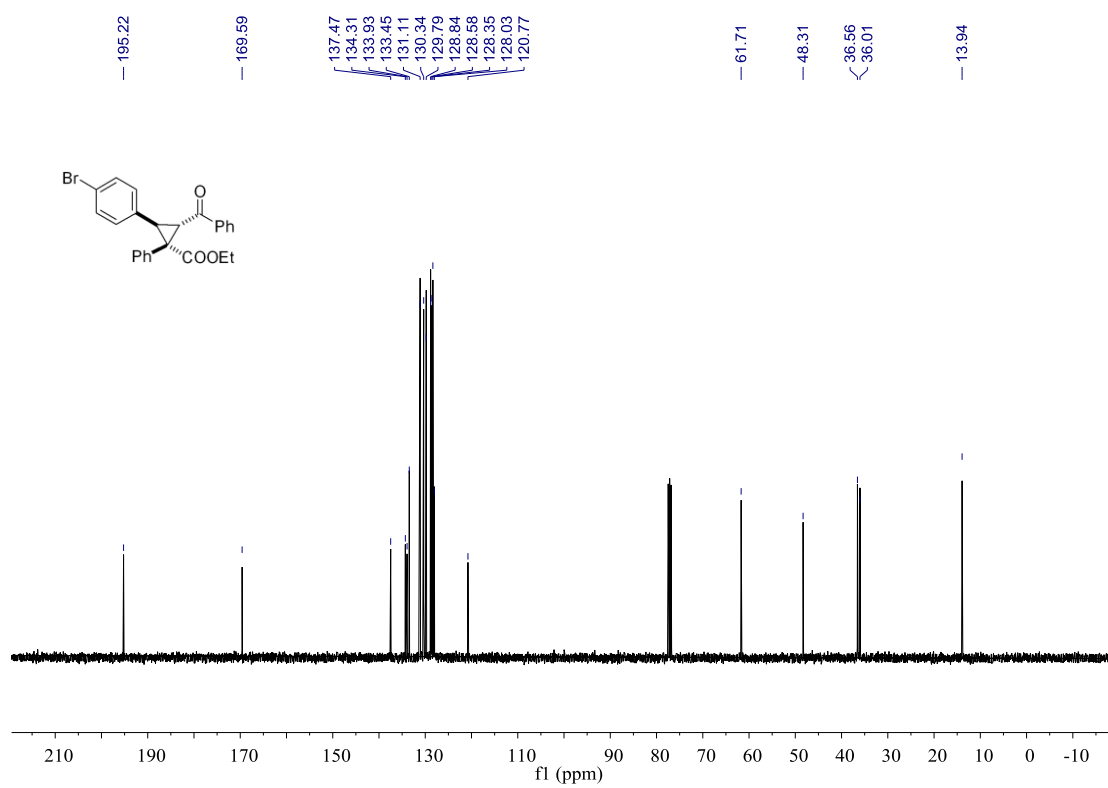

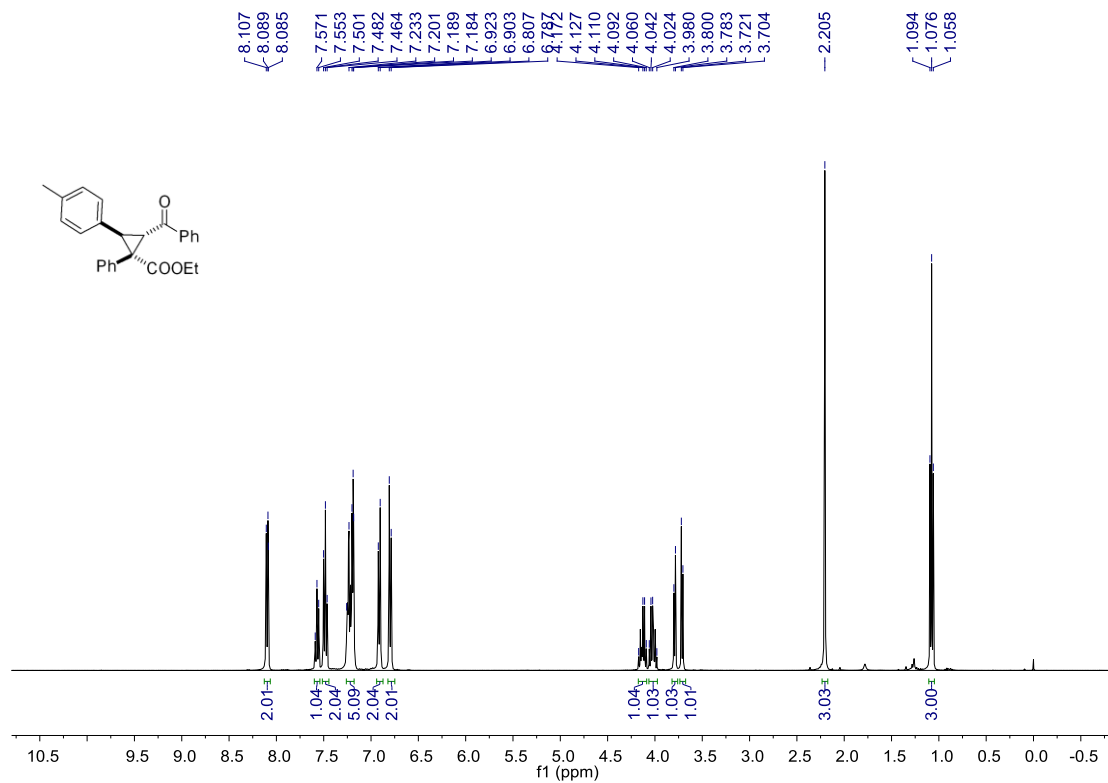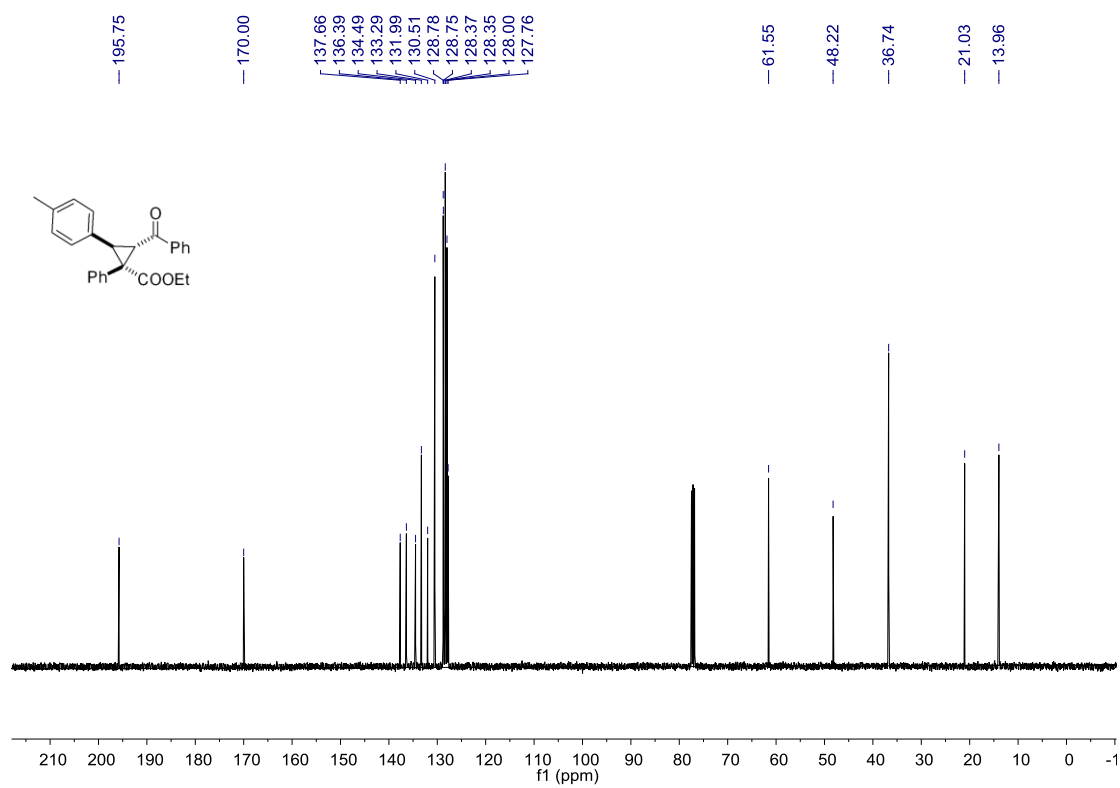



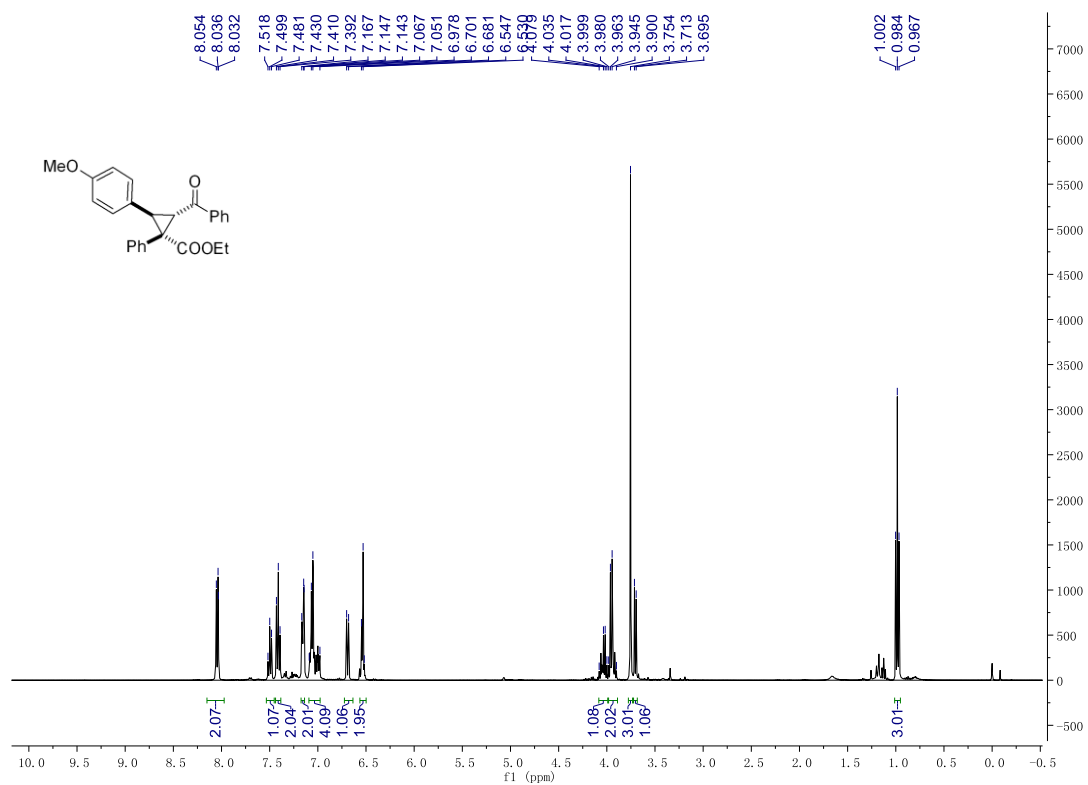

<sup>1</sup>H NMR spectrum of **6ag** (400 MHz, CDCl<sub>3</sub>)

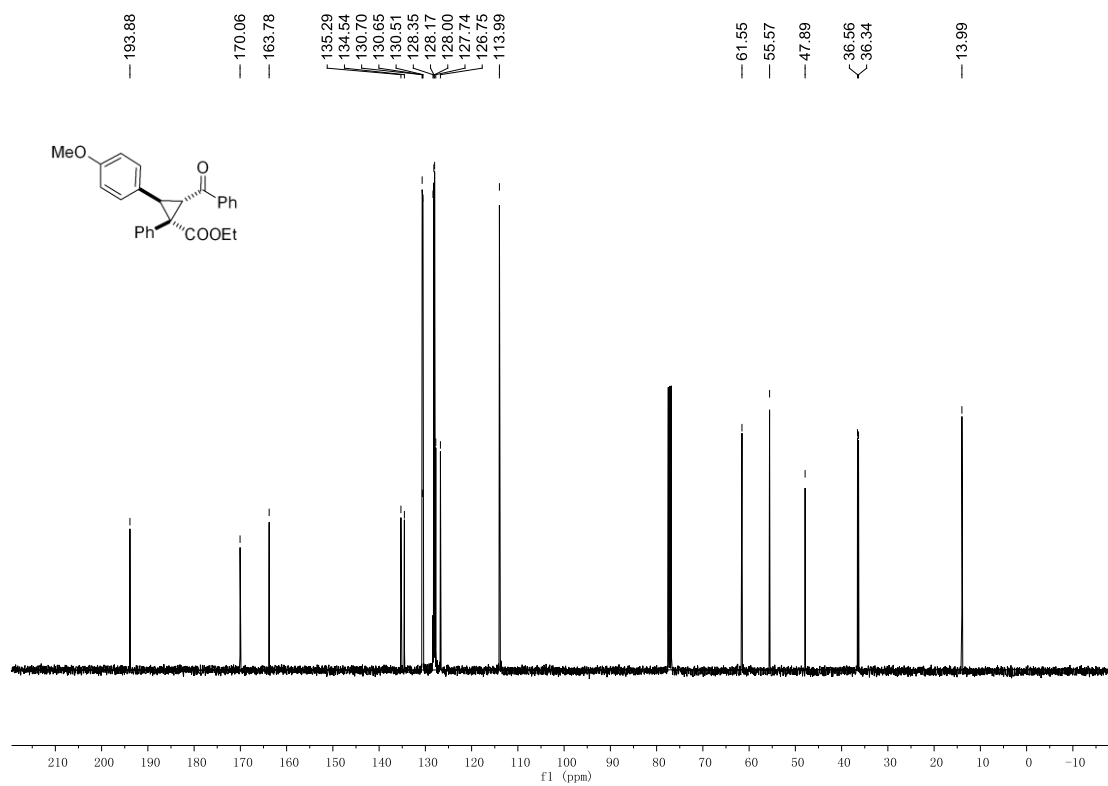

<sup>13</sup>C NMR spectrum of **6ag** (100 MHz, CDCl<sub>3</sub>)

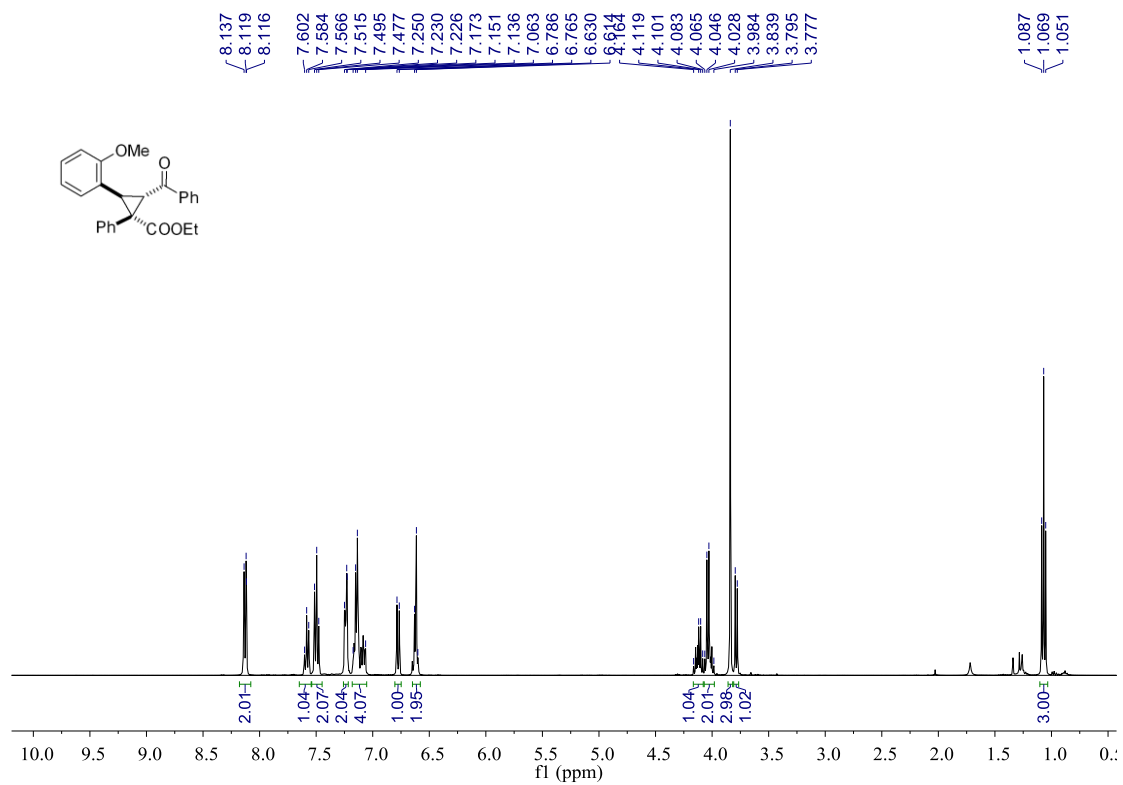

<sup>1</sup>H NMR spectrum of **6ah** (400 MHz, CDCl<sub>3</sub>)

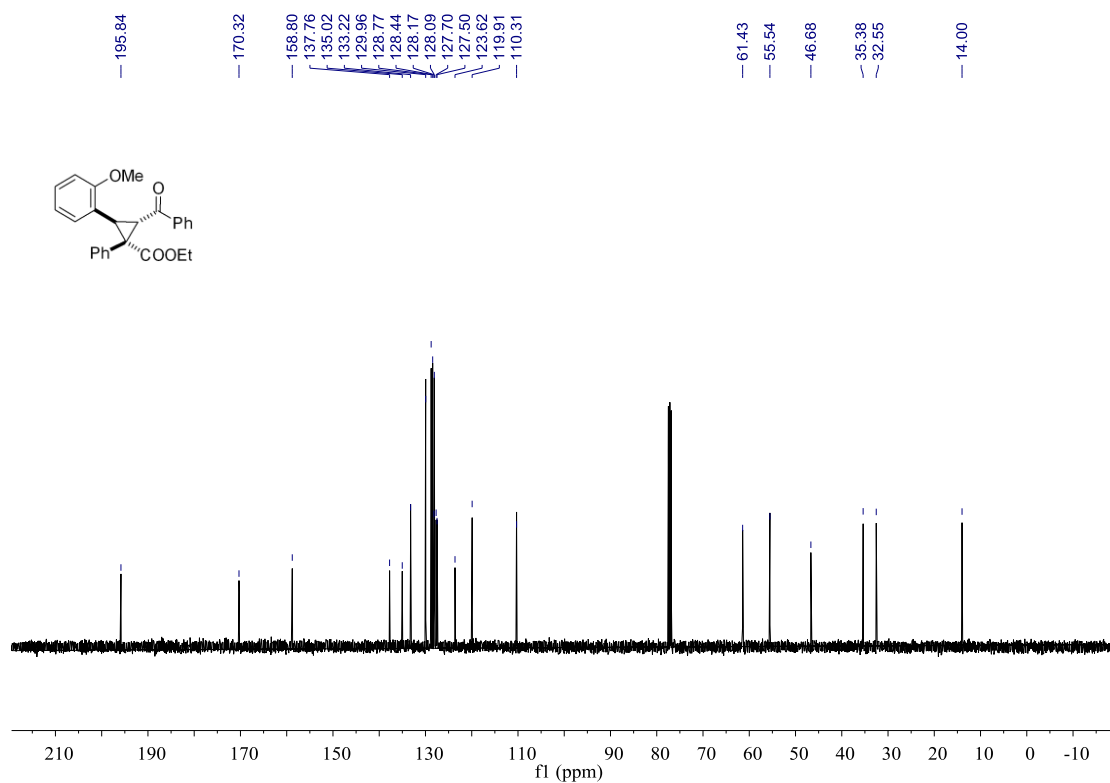

<sup>13</sup>C NMR spectrum of **6ah** (100 MHz, CDCl<sub>3</sub>)

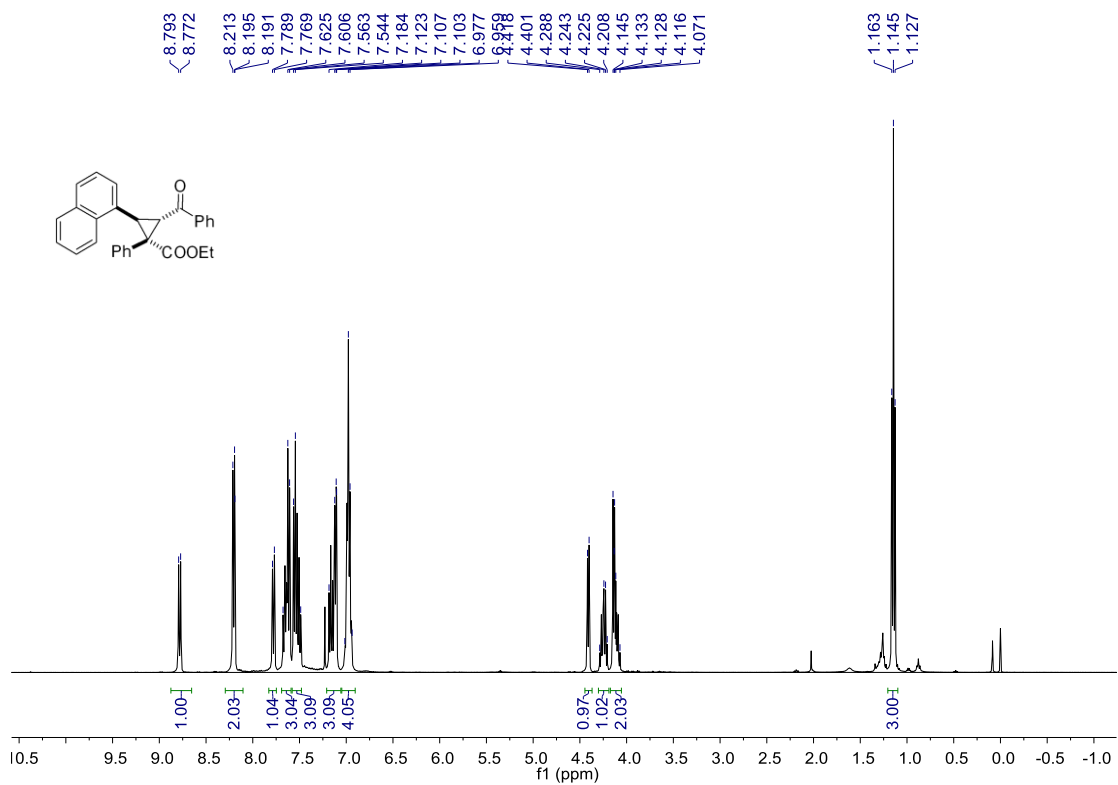

<sup>1</sup>H NMR spectrum of **6ai** (400 MHz, CDCl<sub>3</sub>)

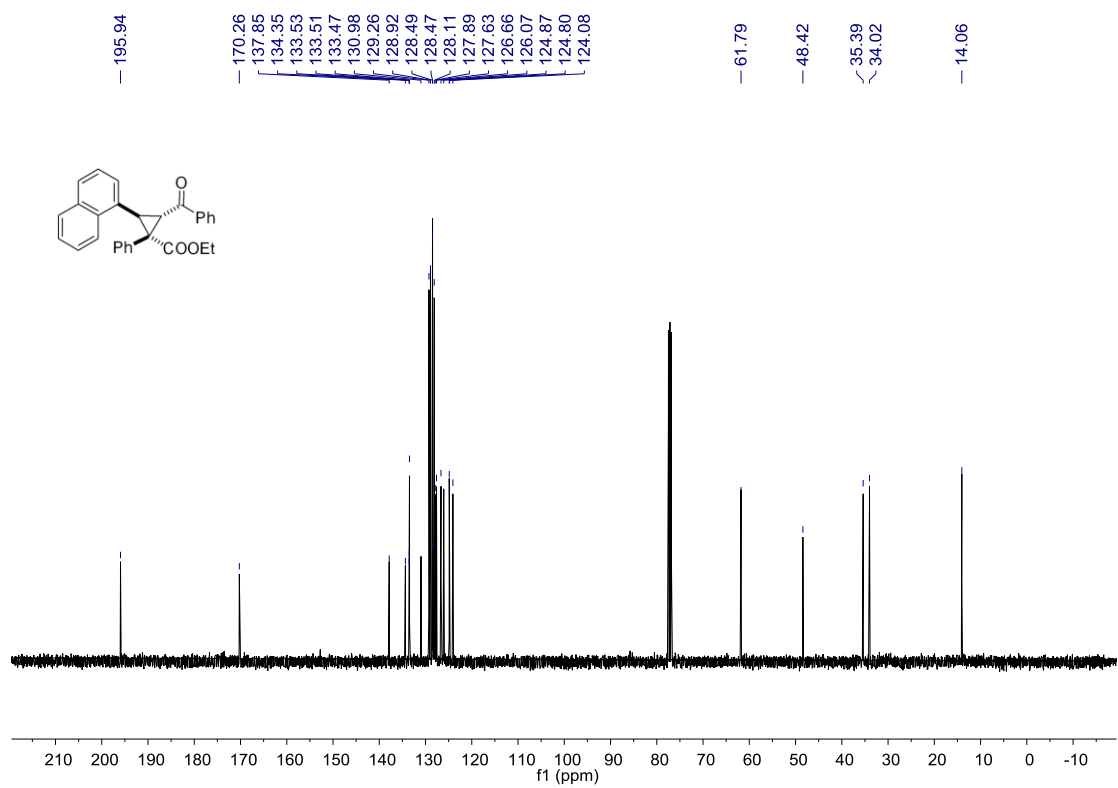

<sup>13</sup>C NMR spectrum of **6ai** (100 MHz, CDCl<sub>3</sub>)

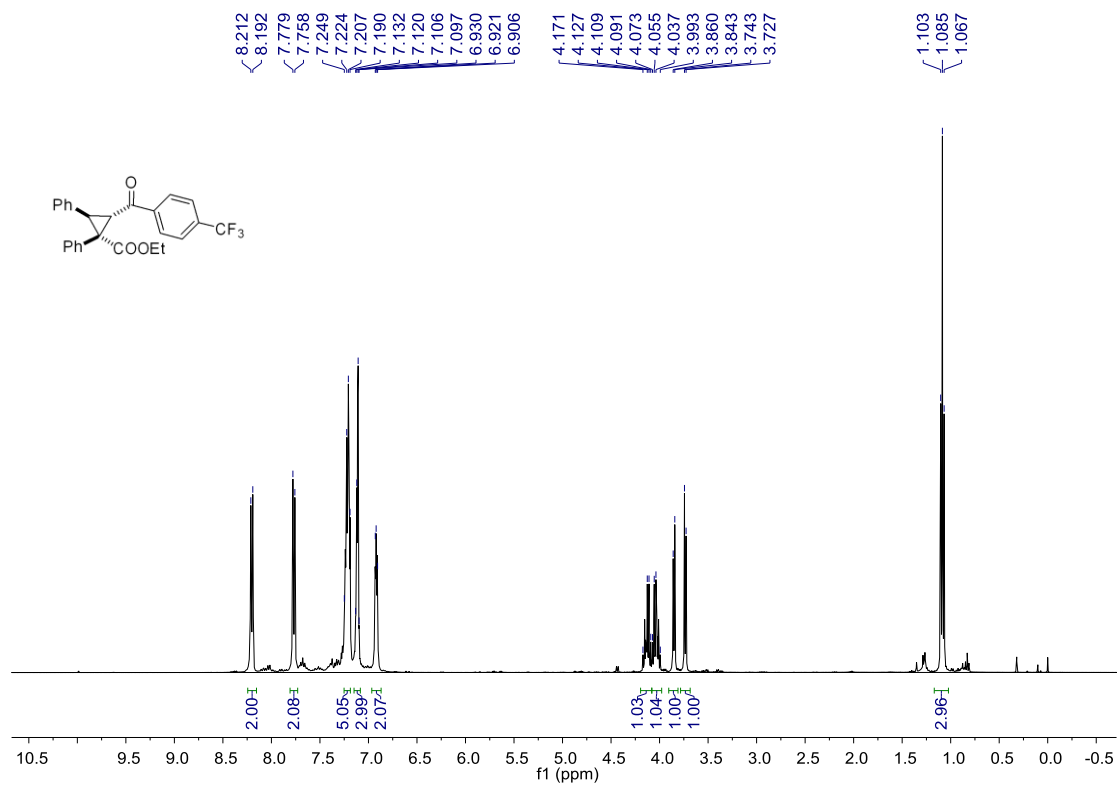

<sup>1</sup>H NMR spectrum of **6aj** (400 MHz, CDCl<sub>3</sub>)

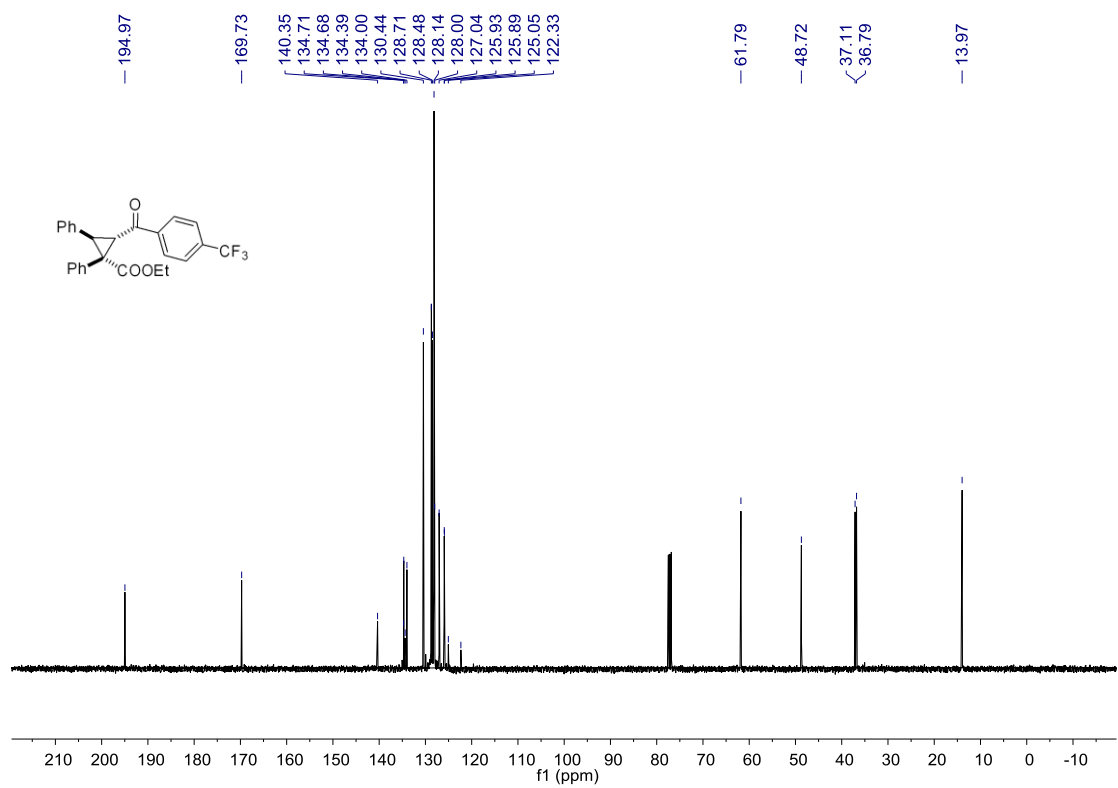

<sup>13</sup>C NMR spectrum of **6aj** (100 MHz, CDCl<sub>3</sub>)

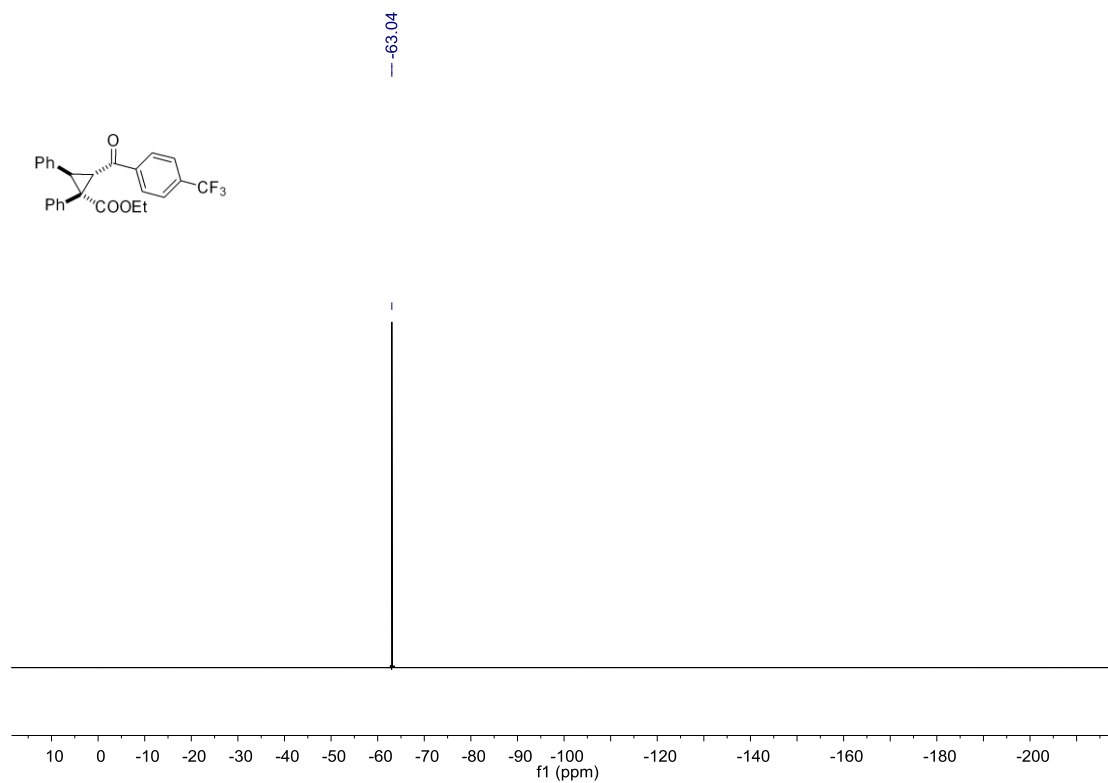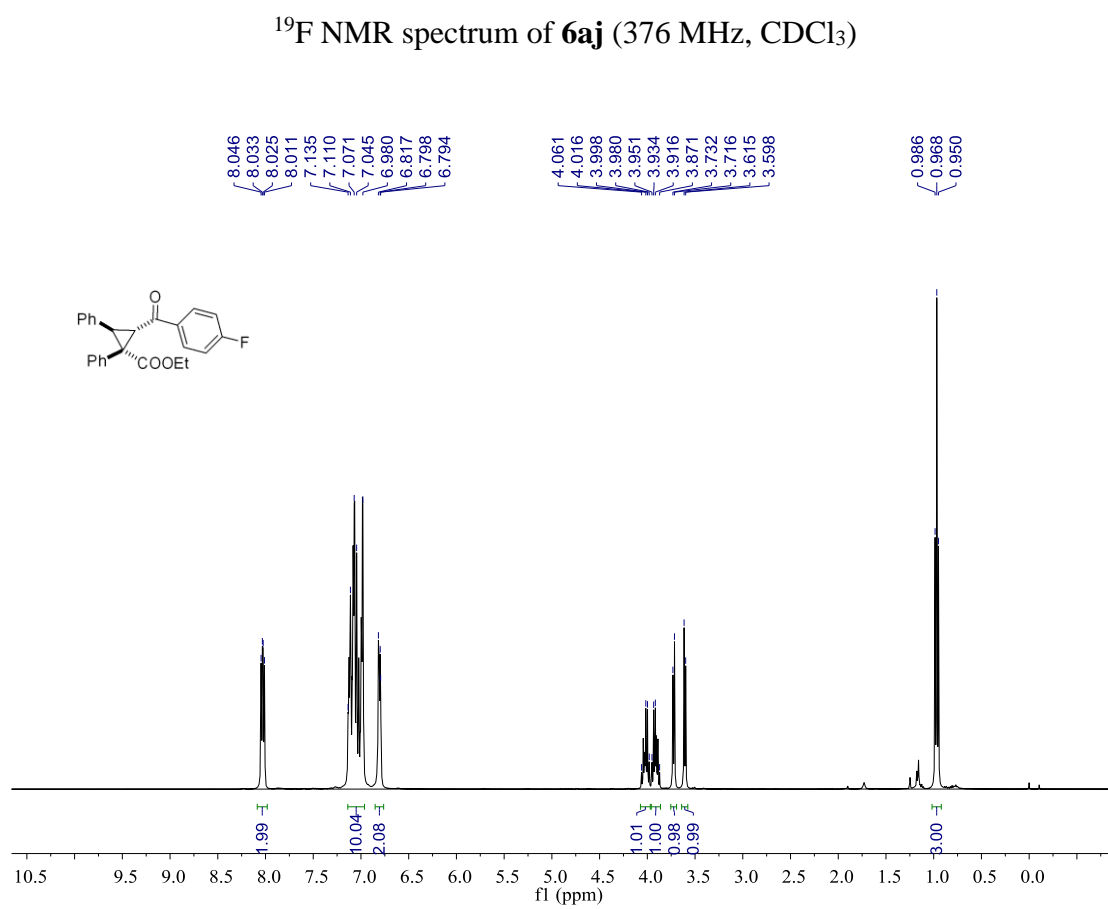

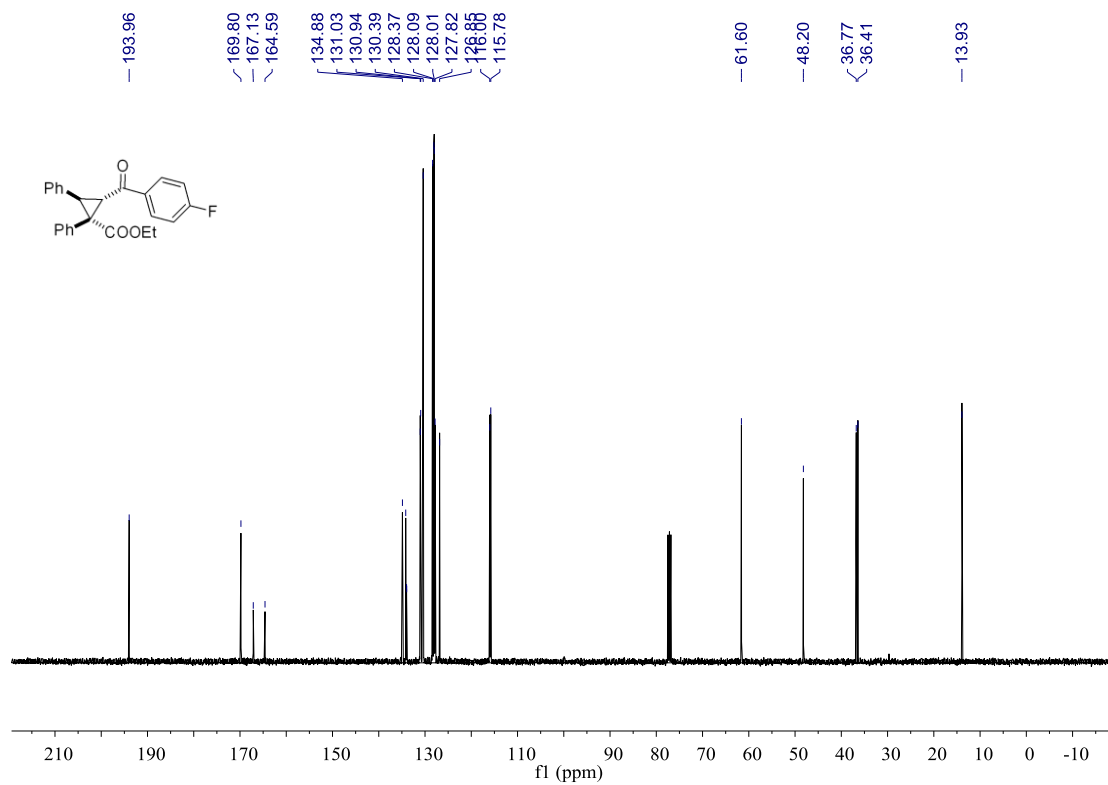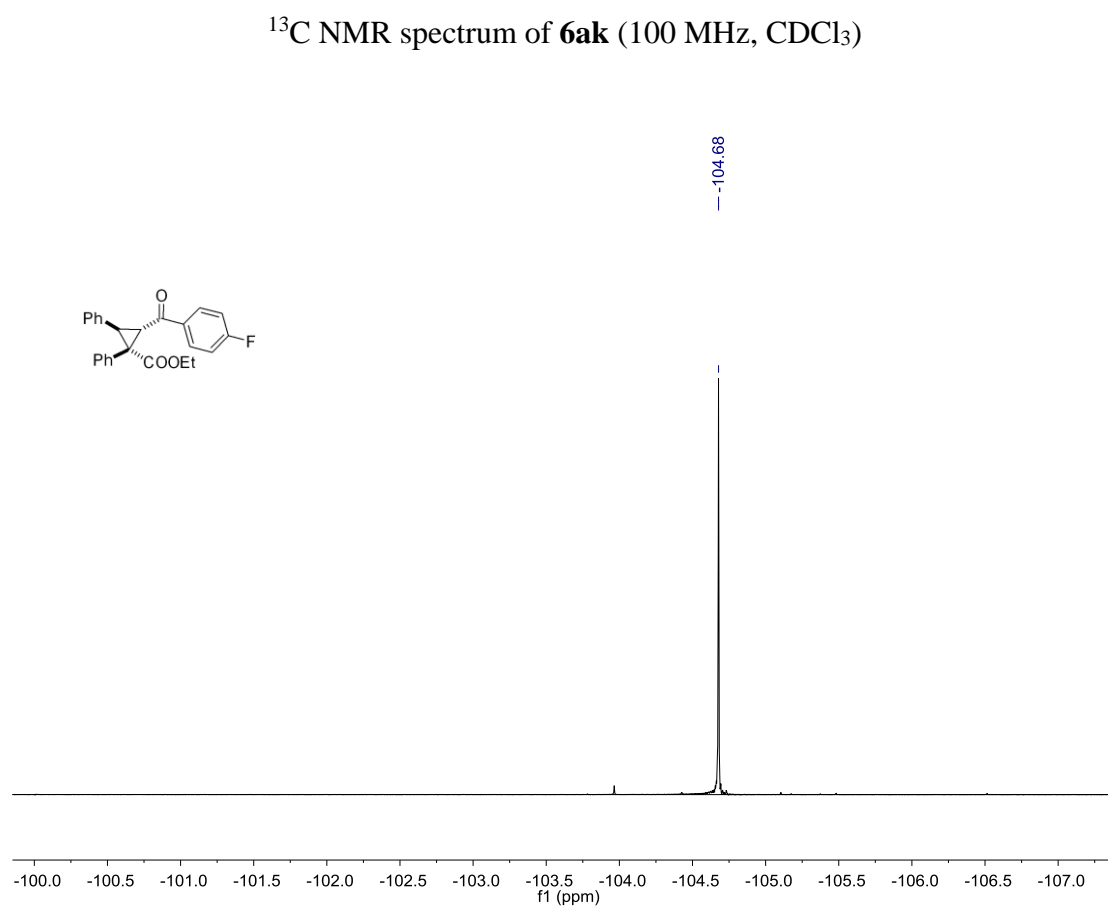

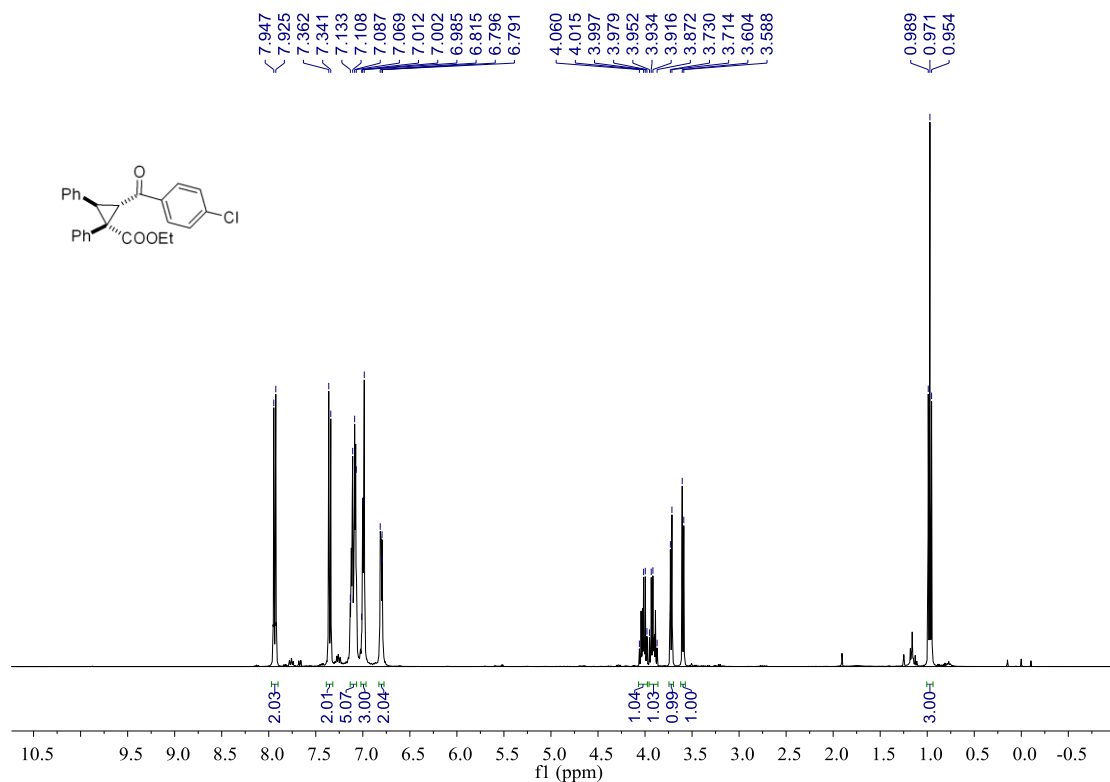

<sup>1</sup>H NMR spectrum of **6al** (400 MHz, CDCl<sub>3</sub>)

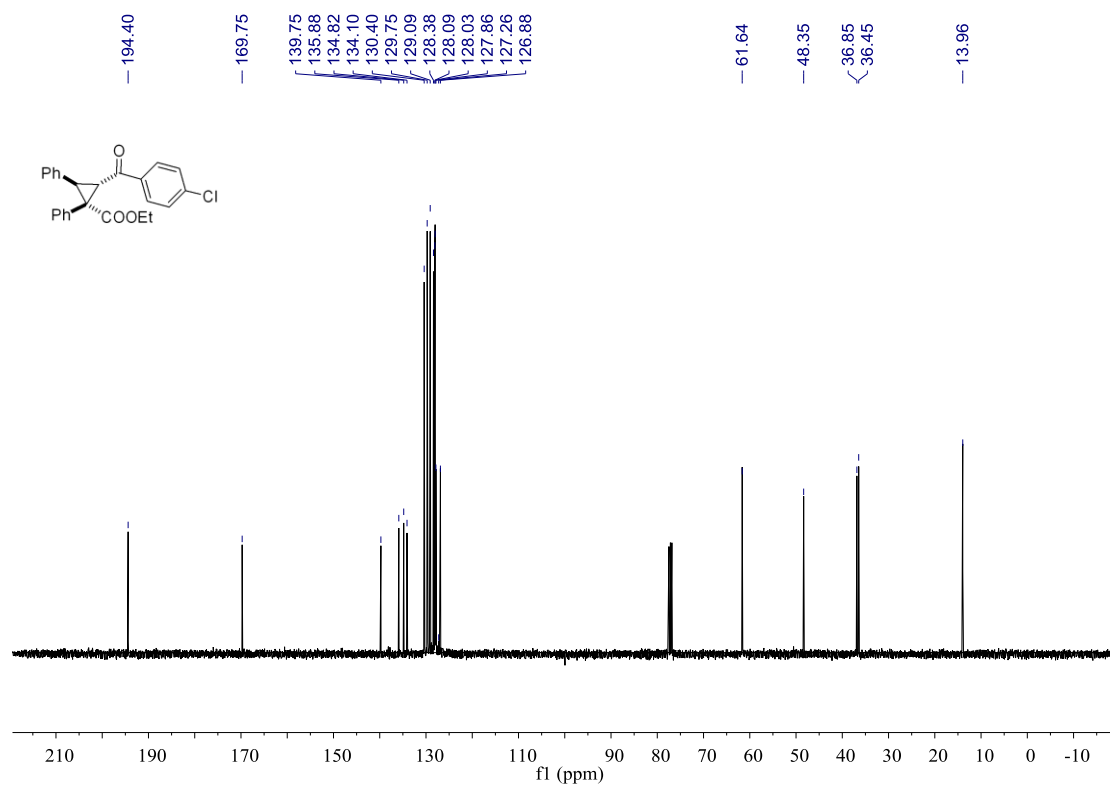

<sup>13</sup>C NMR spectrum of **6al** (100 MHz, CDCl<sub>3</sub>)

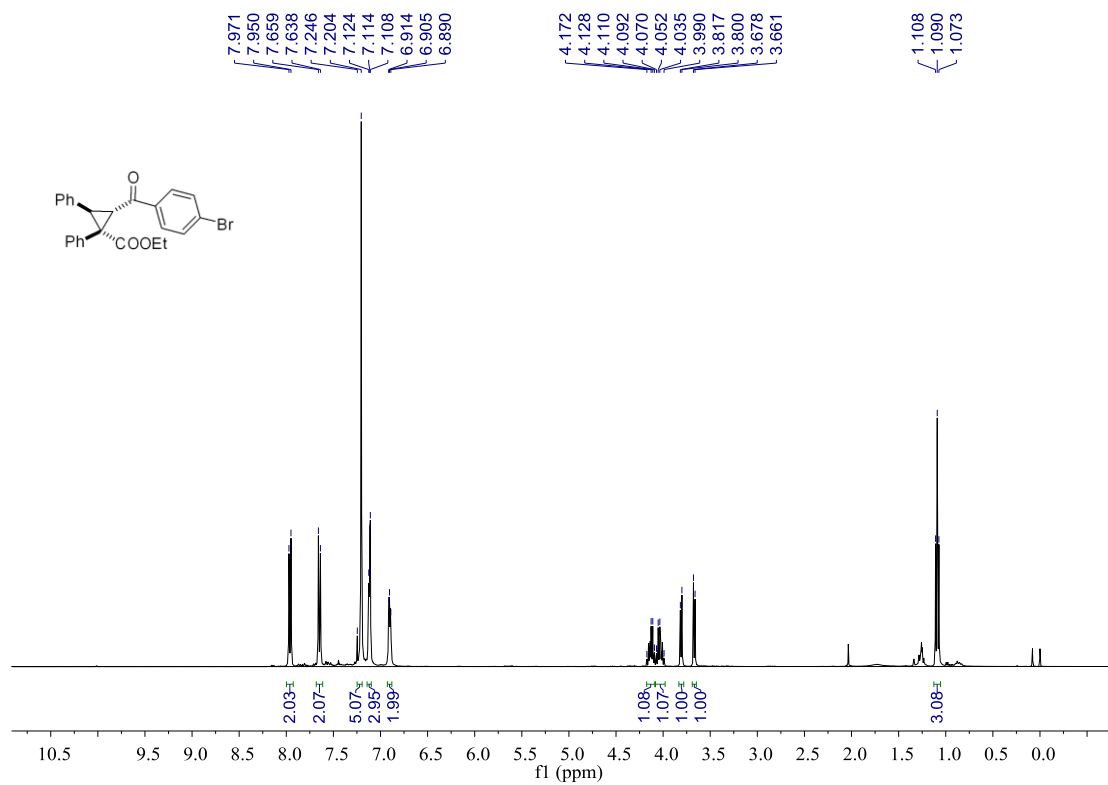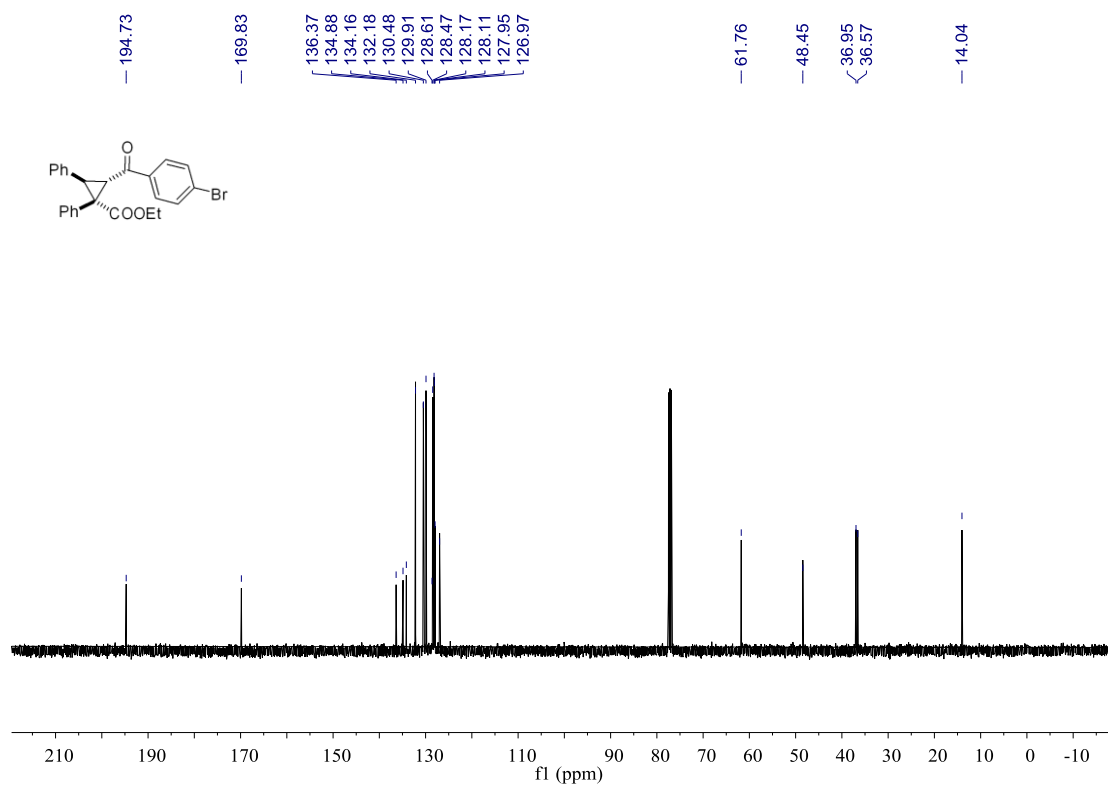



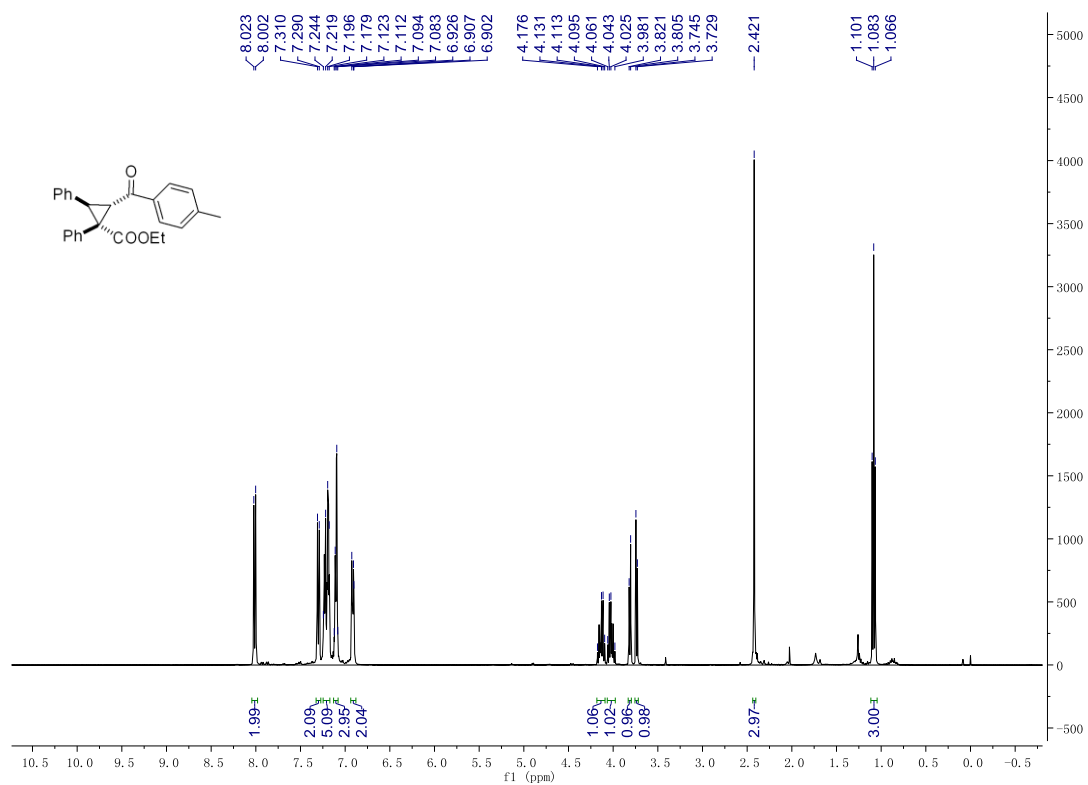

$^1\text{H}$  NMR spectrum of **6an** (400 MHz,  $\text{CDCl}_3$ )

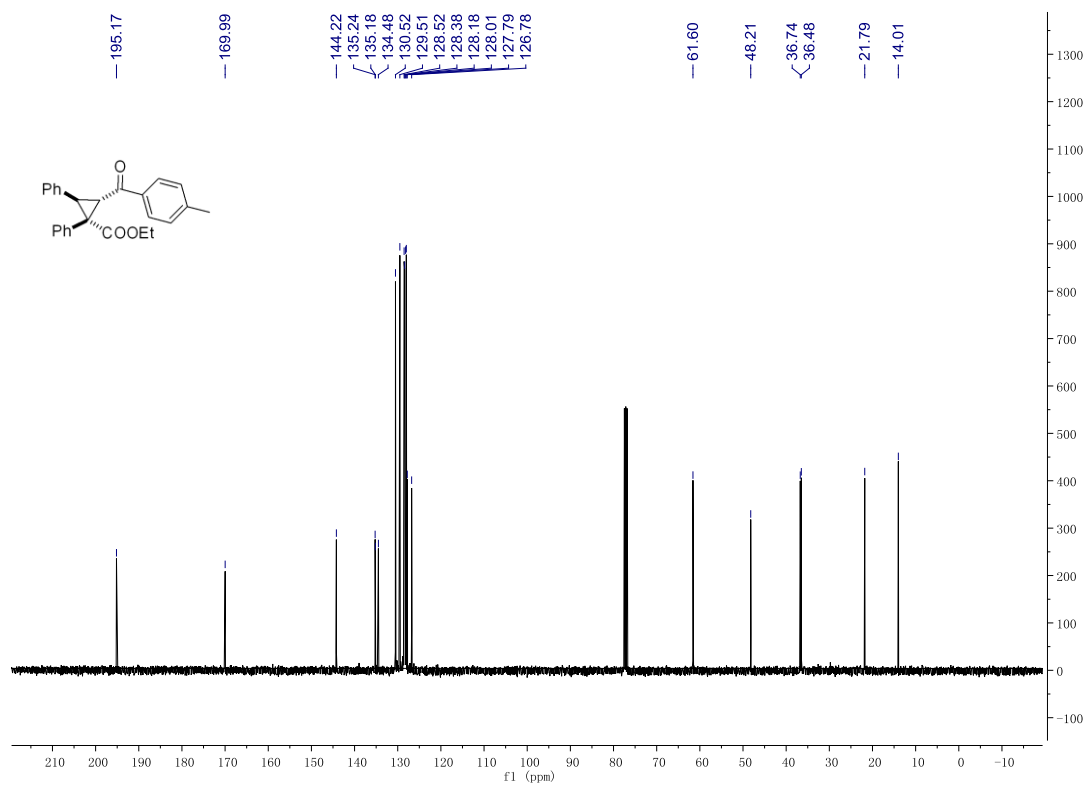

$^{13}\text{C}$  NMR spectrum of **6an** (100 MHz,  $\text{CDCl}_3$ )

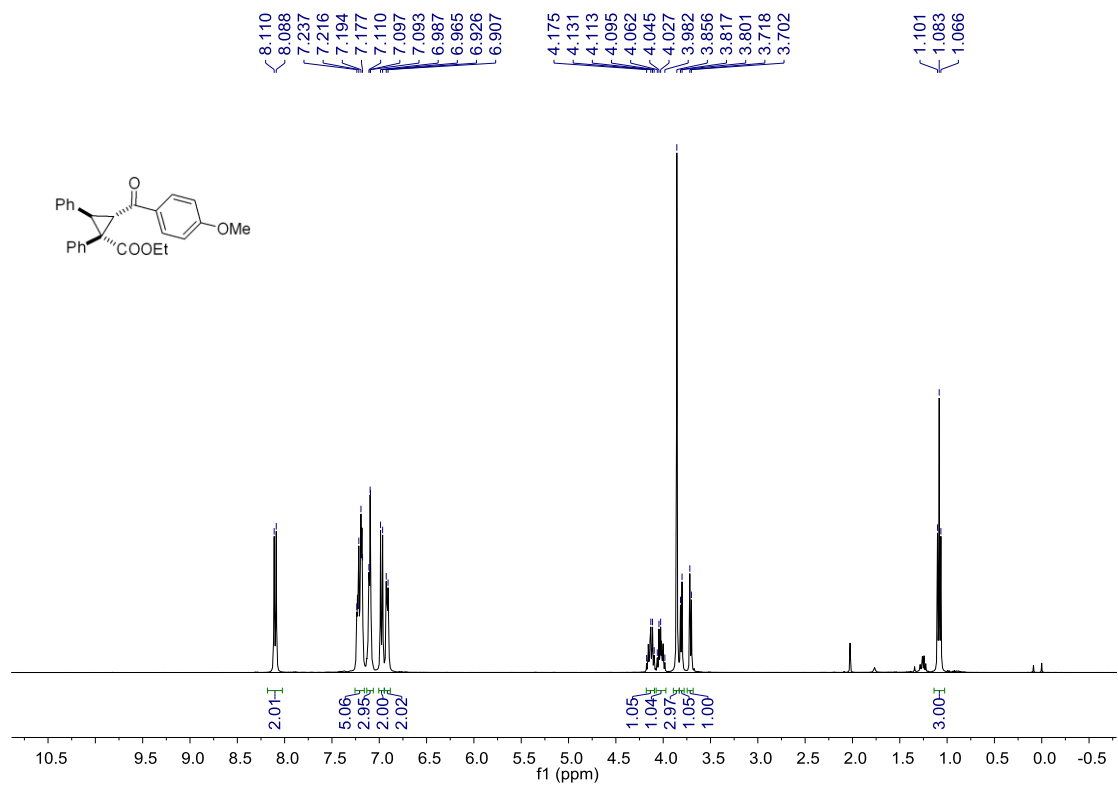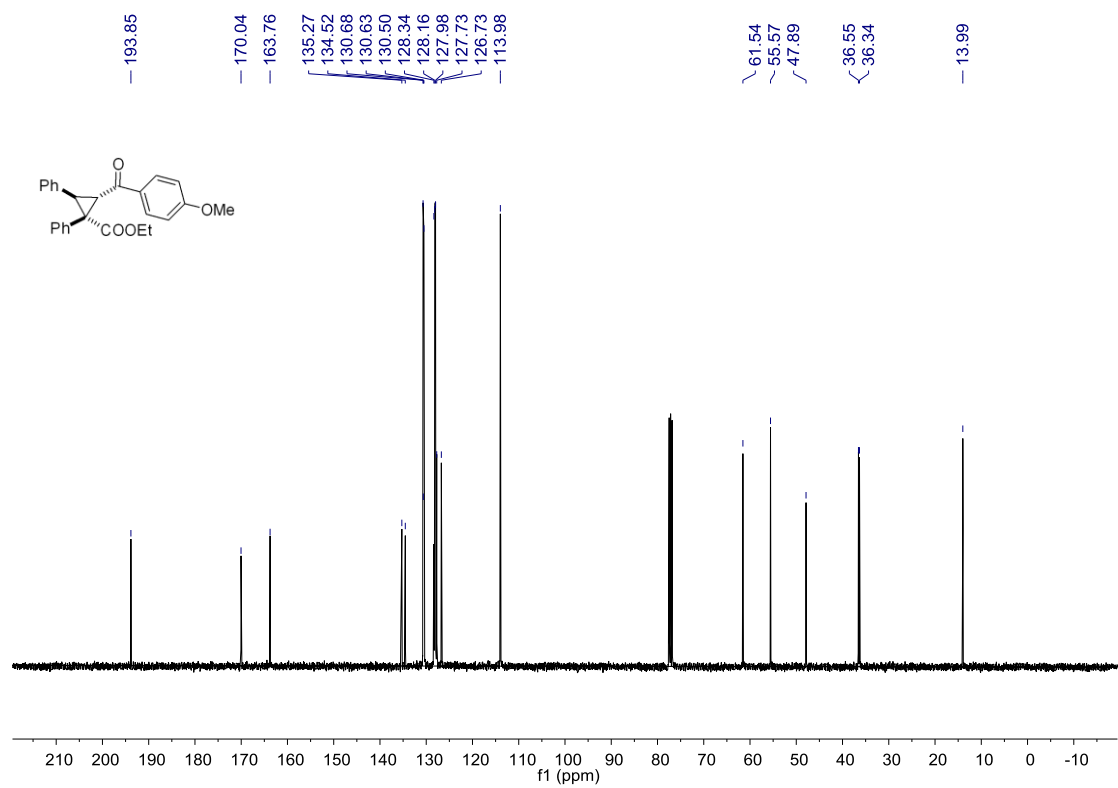

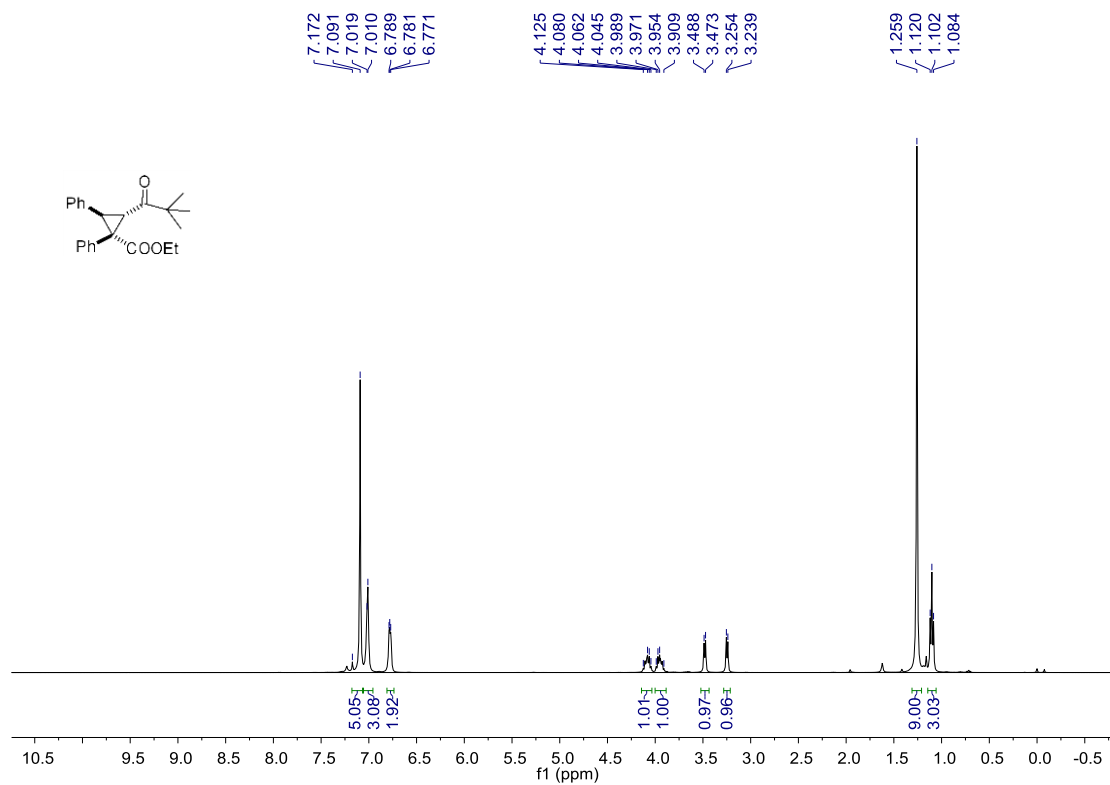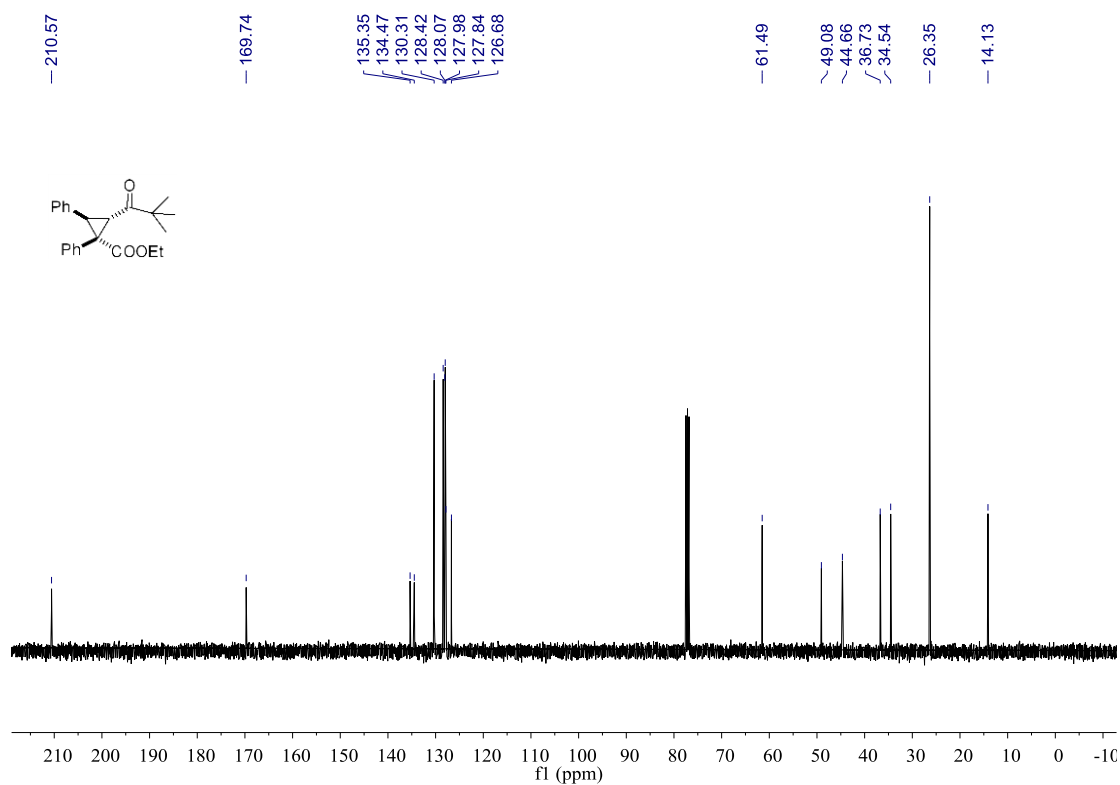

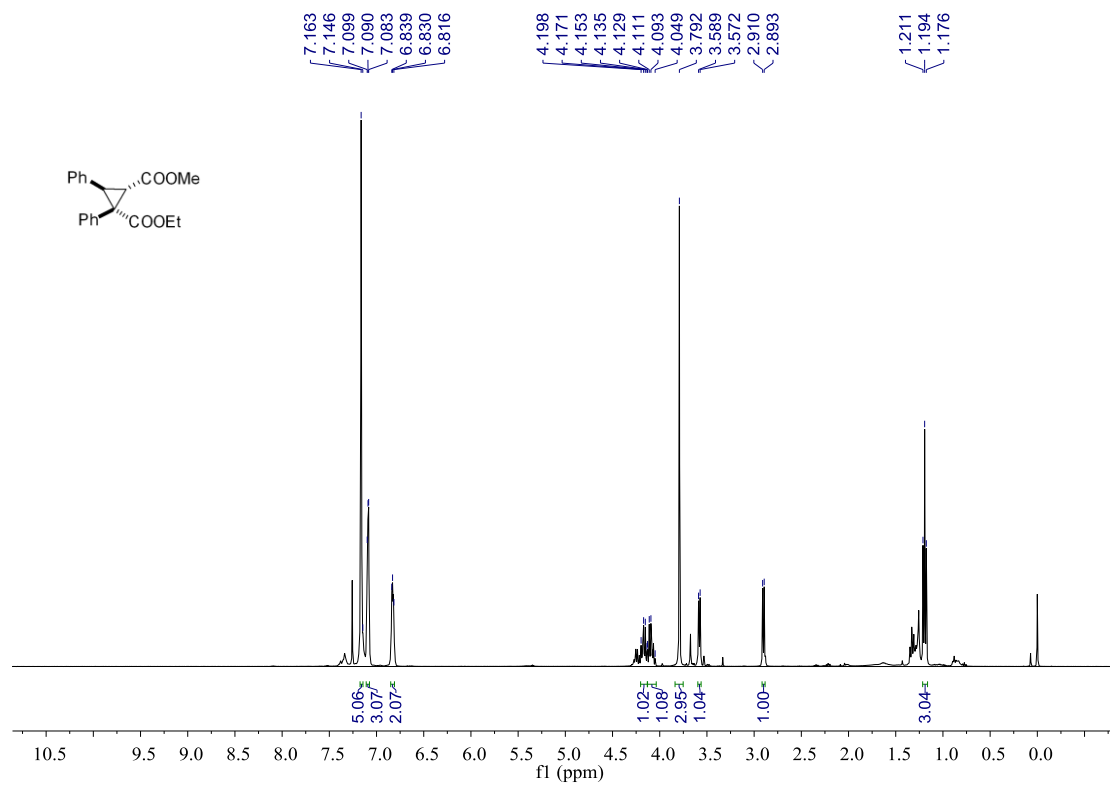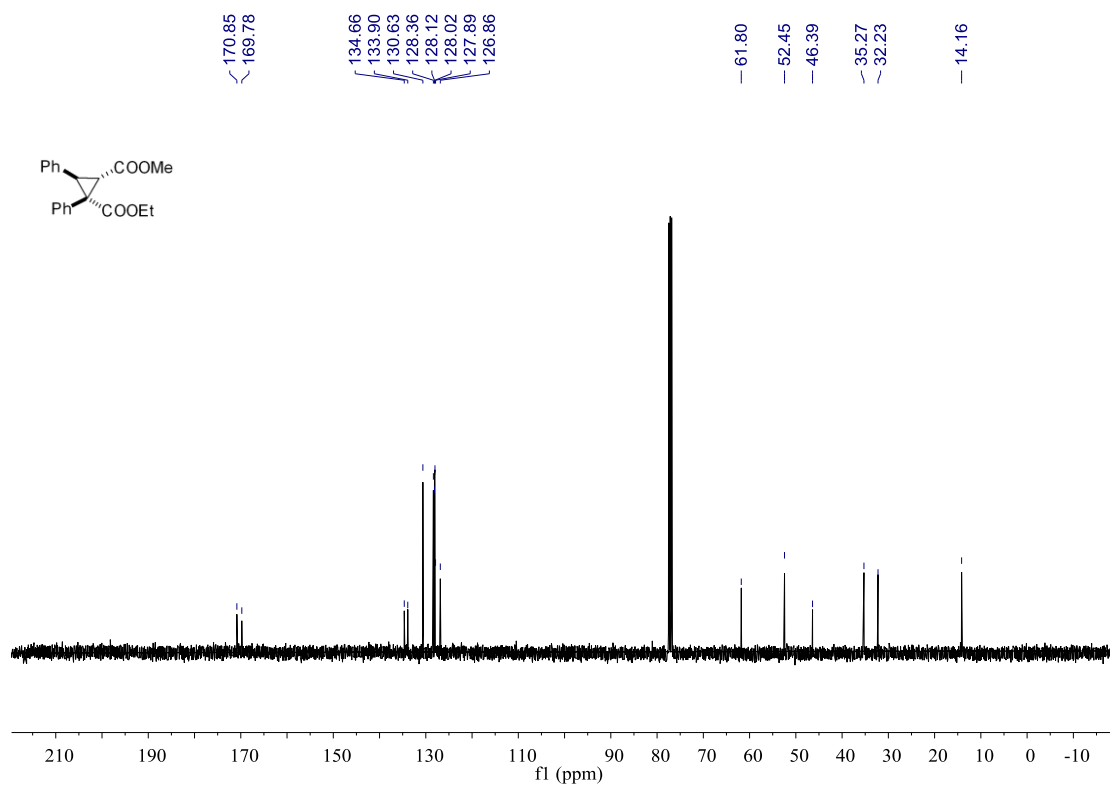

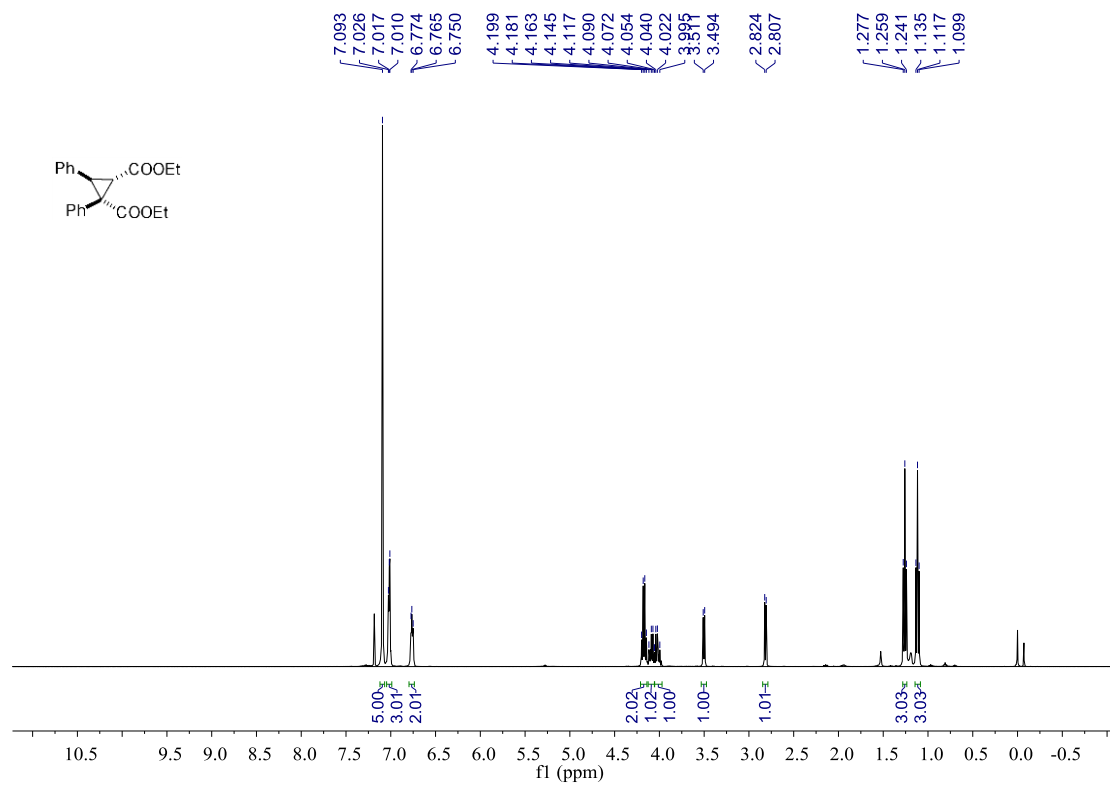

<sup>1</sup>H NMR spectrum of **6ar** (400 MHz, CDCl<sub>3</sub>)

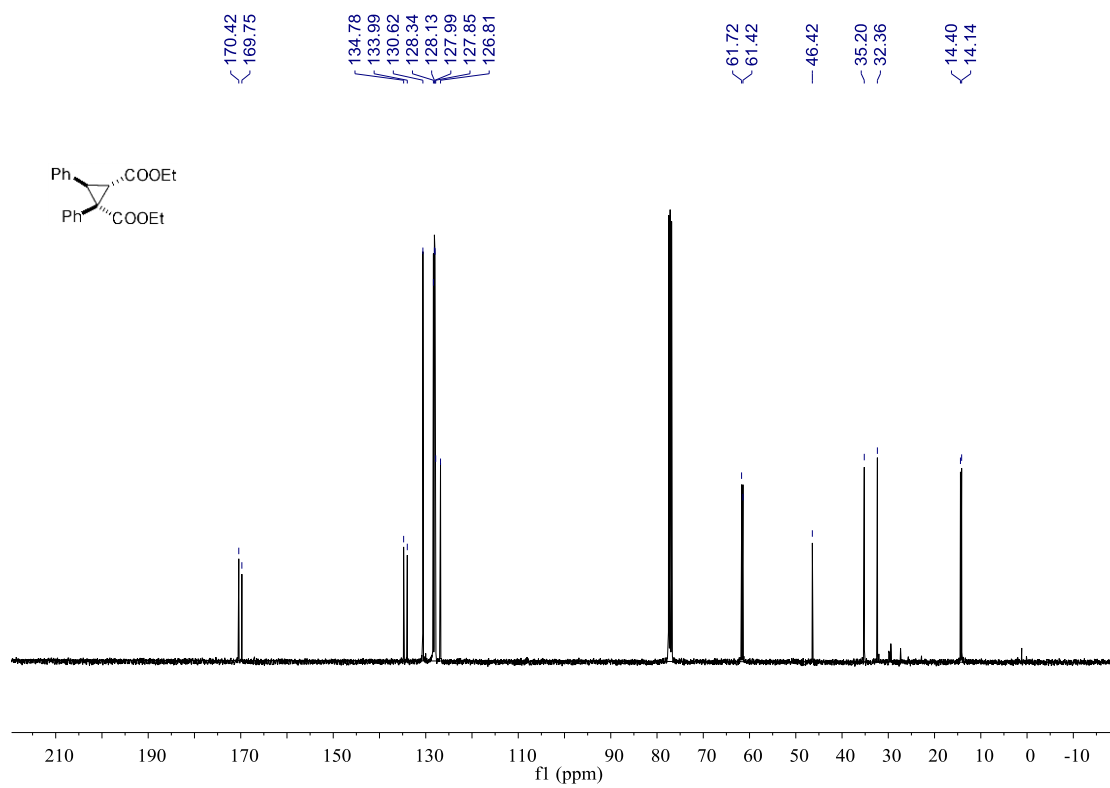

<sup>13</sup>C NMR spectrum of **6ar** (100 MHz, CDCl<sub>3</sub>)

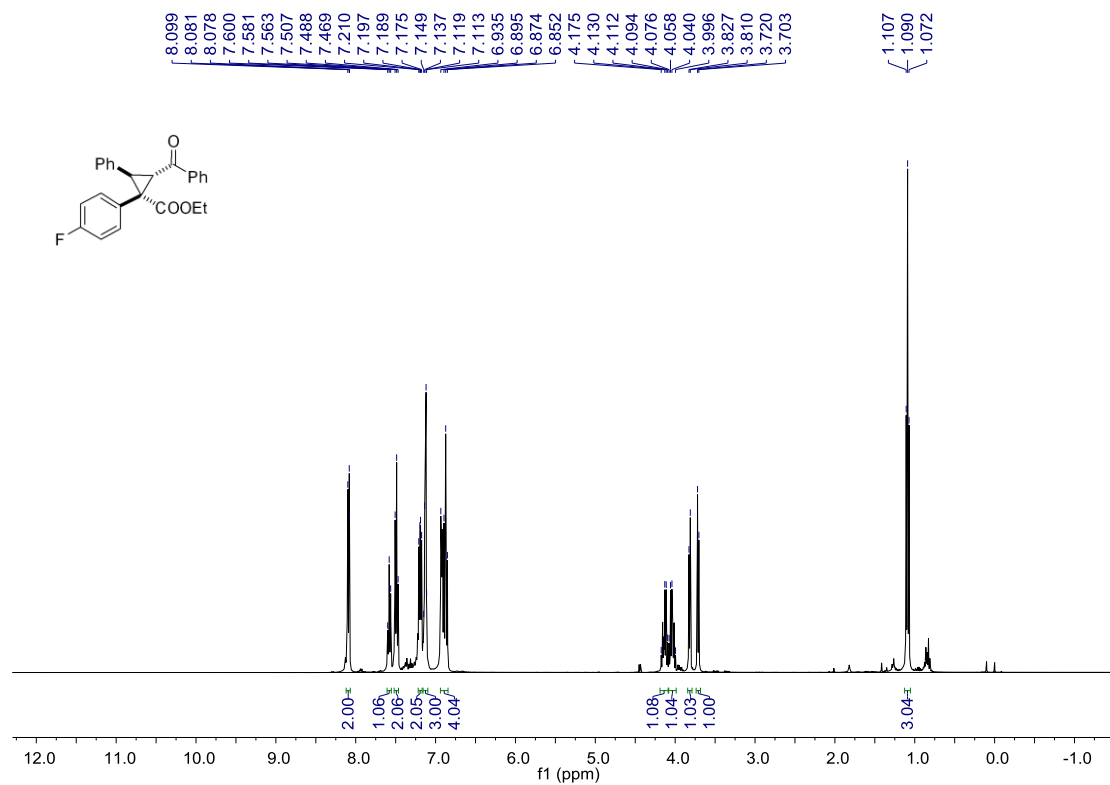

$^1\text{H}$  NMR spectrum of **6ba** (400 MHz,  $\text{CDCl}_3$ )

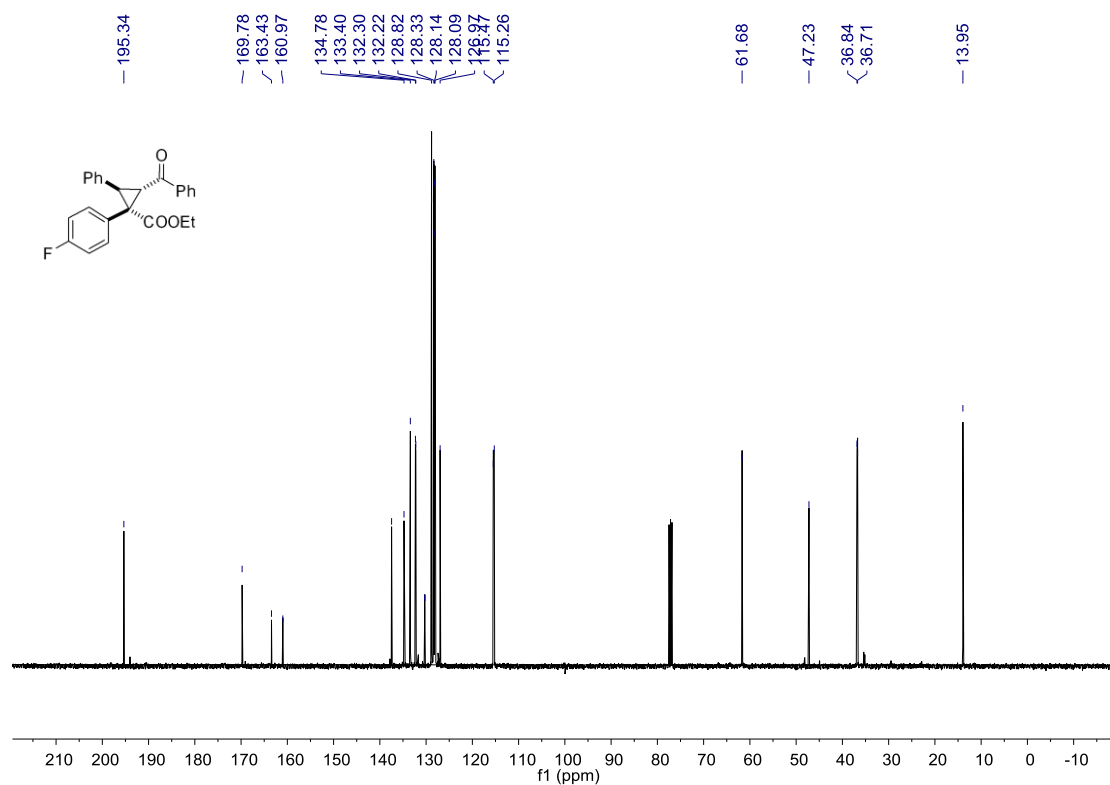

$^{13}\text{C}$  NMR spectrum of **6ba** (100 MHz,  $\text{CDCl}_3$ )

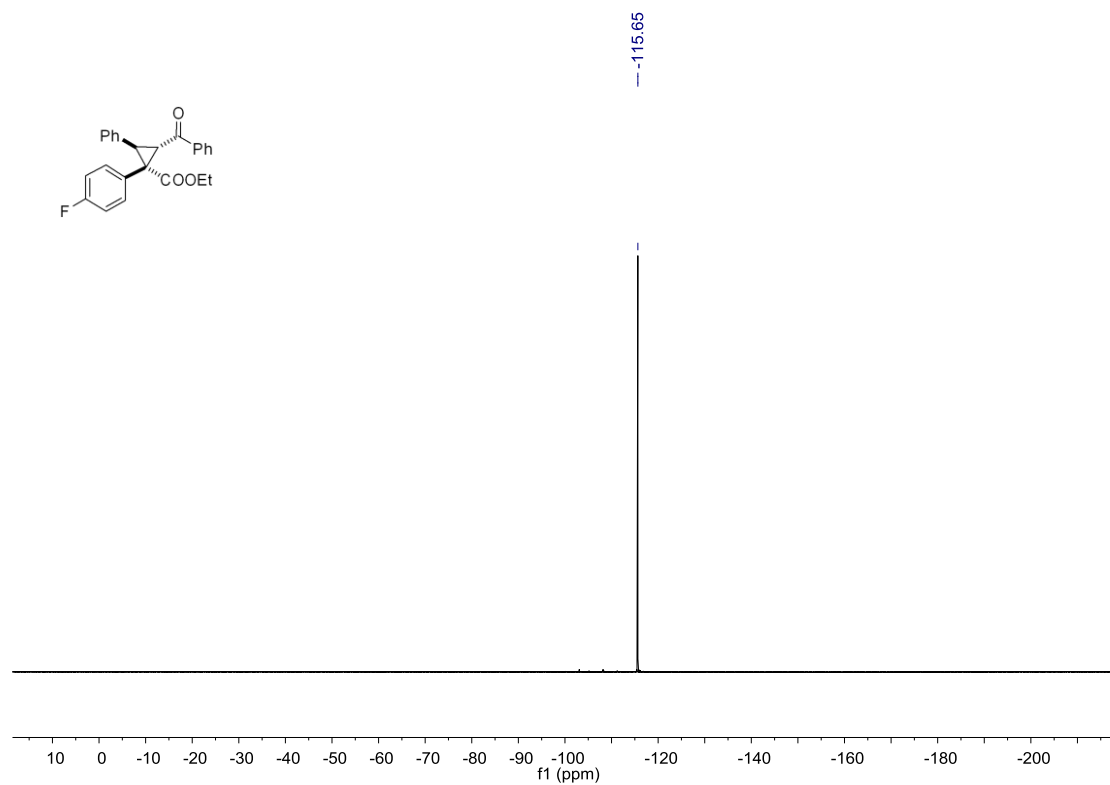

$^{19}\text{F}$  NMR spectrum of **6ba** (376 MHz,  $\text{CDCl}_3$ )

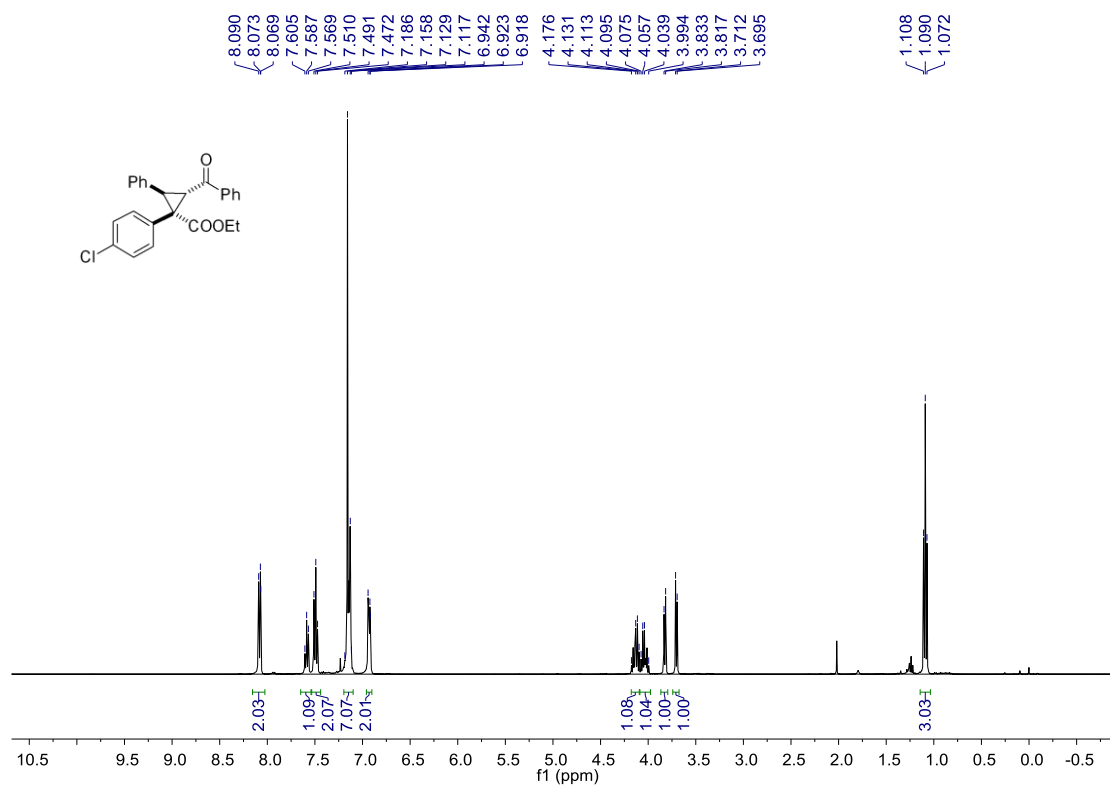

$^1\text{H}$  NMR spectrum of **6ca** (400 MHz,  $\text{CDCl}_3$ )

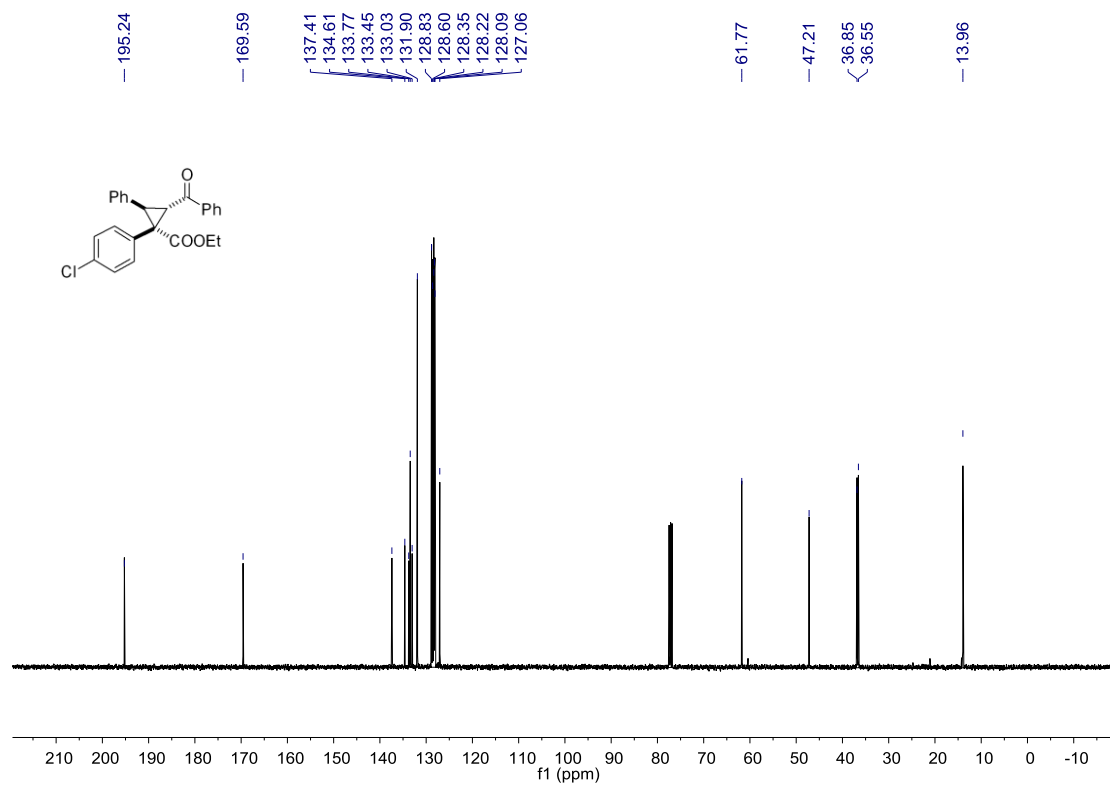

$^{13}\text{C}$  NMR spectrum of **6ca** (100 MHz,  $\text{CDCl}_3$ )

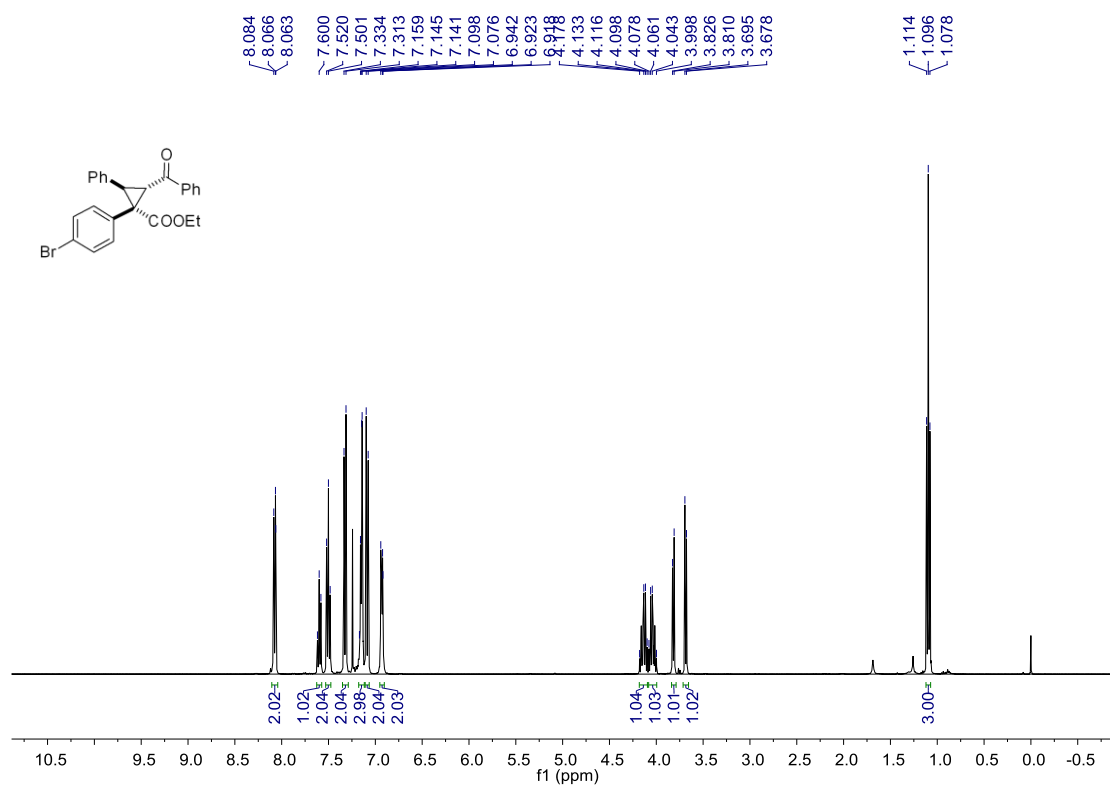

$^1\text{H}$  NMR spectrum of **6da** (400 MHz,  $\text{CDCl}_3$ )



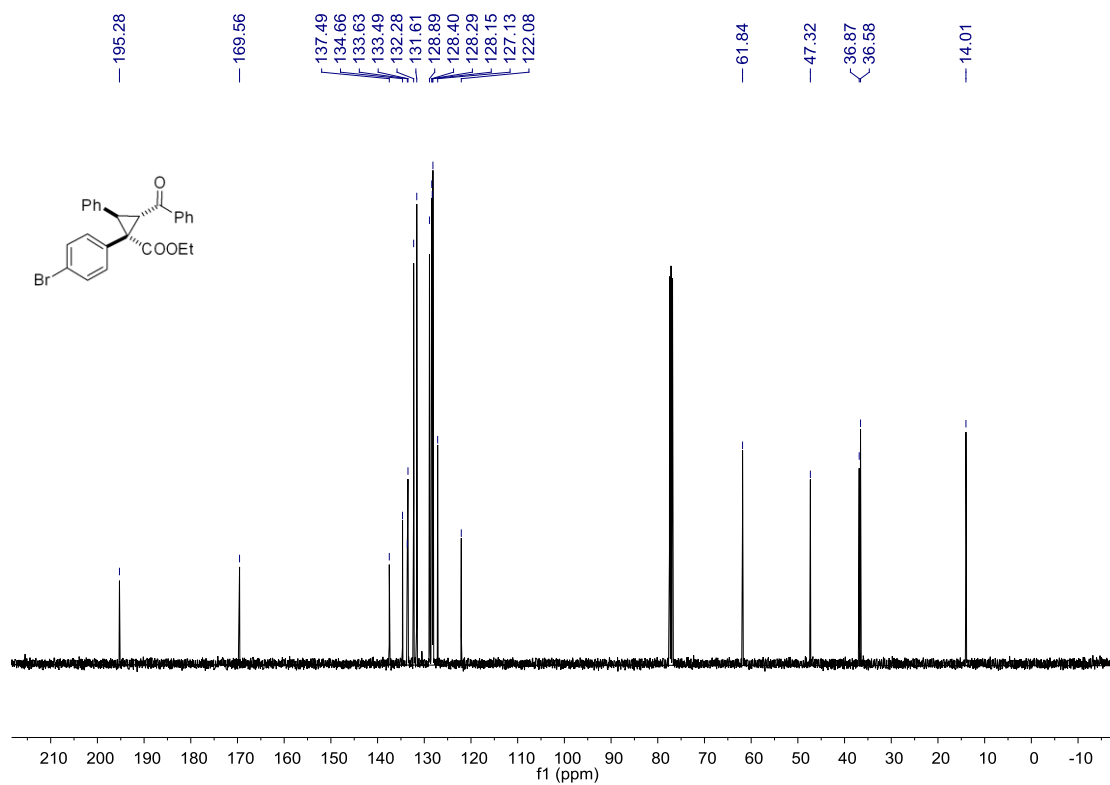

$^{13}\text{C}$  NMR spectrum of **6da** (100 MHz,  $\text{CDCl}_3$ )

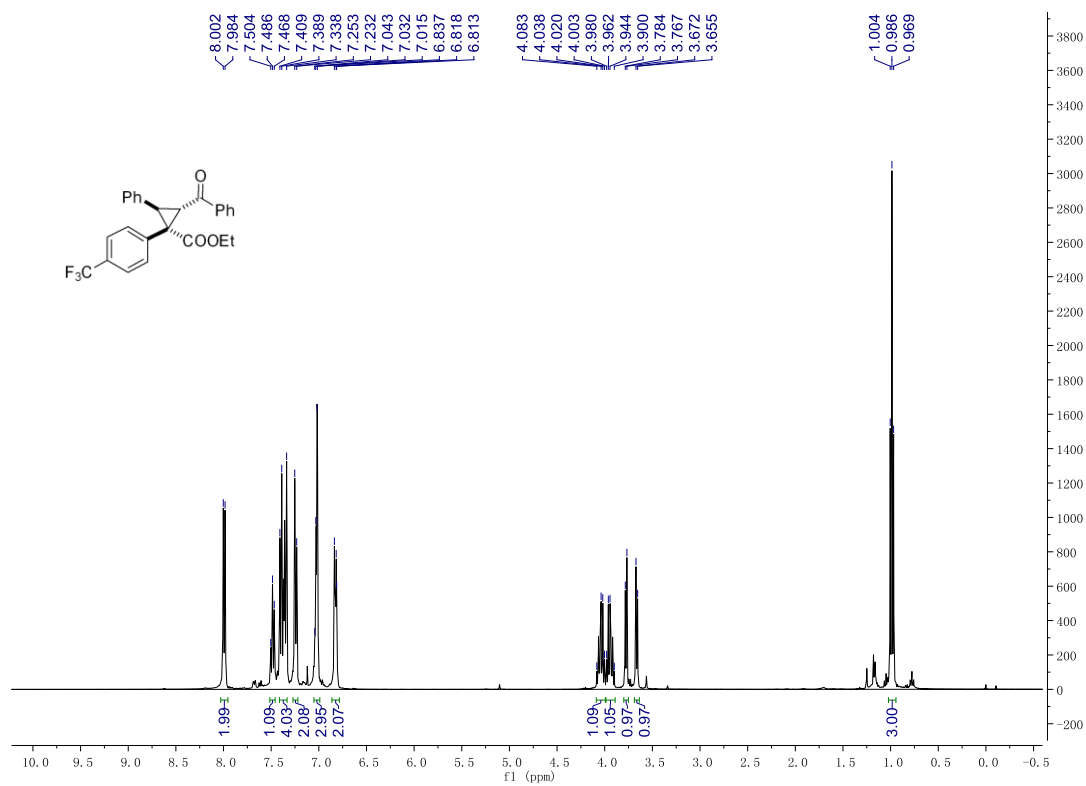

$^1\text{H}$  NMR spectrum of **6ea** (400 MHz,  $\text{CDCl}_3$ )

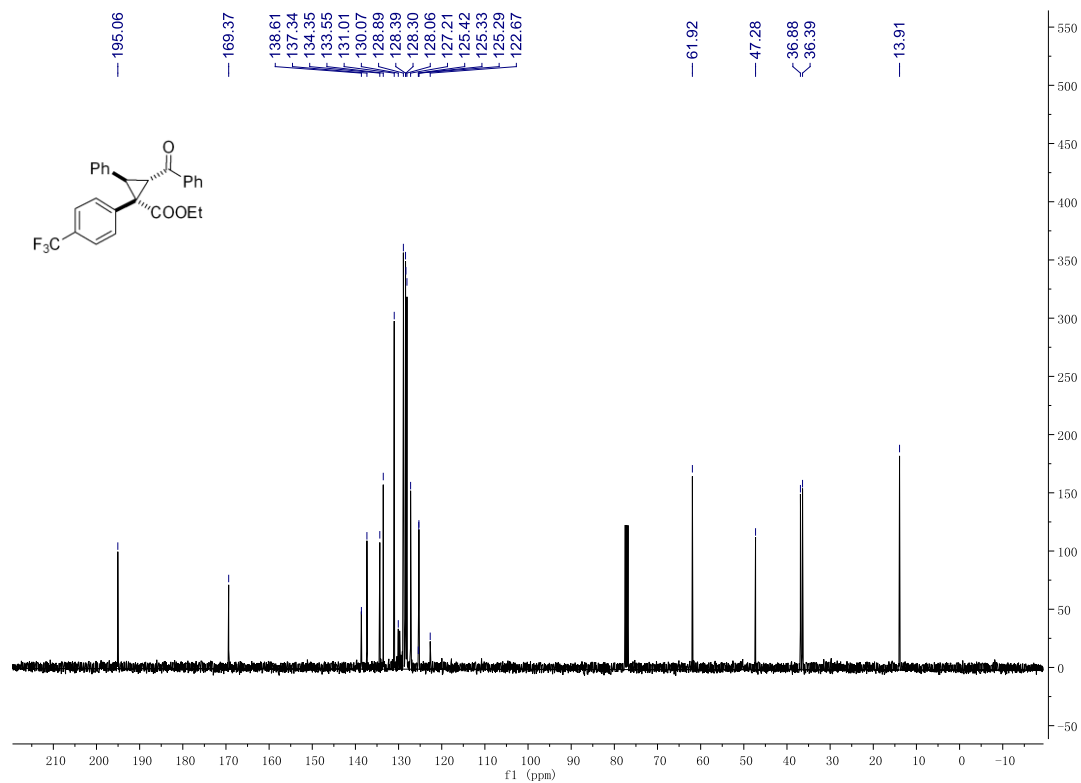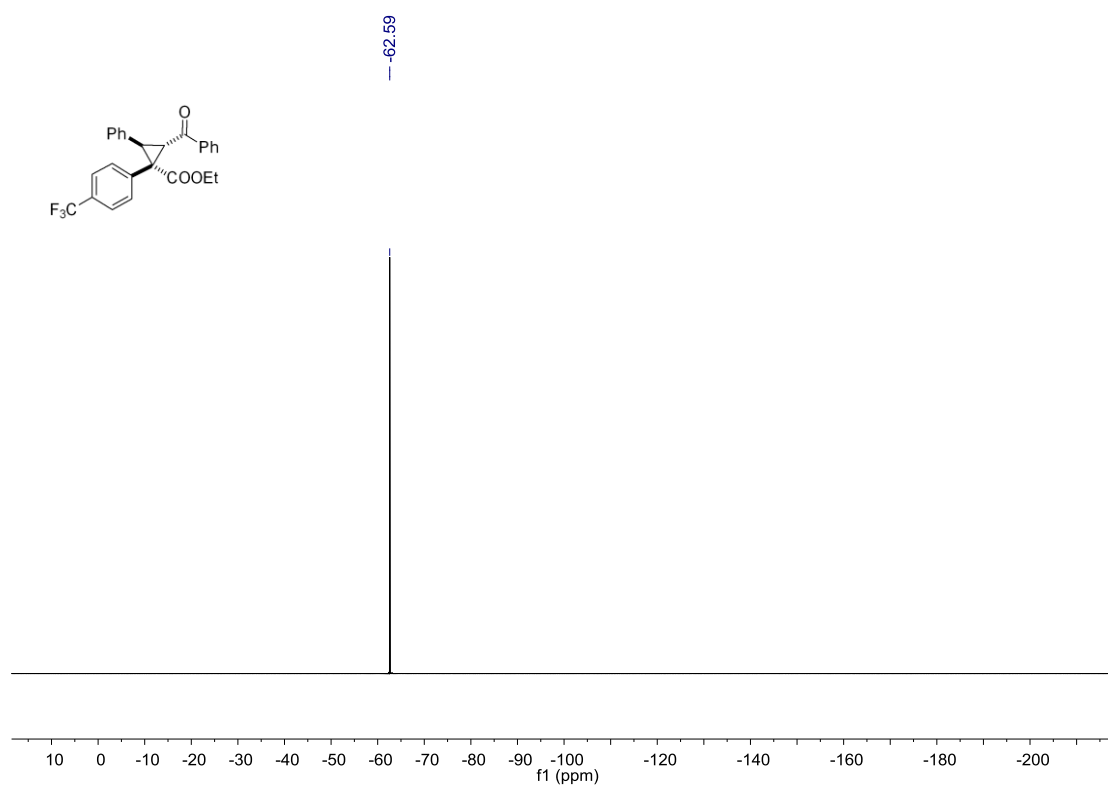

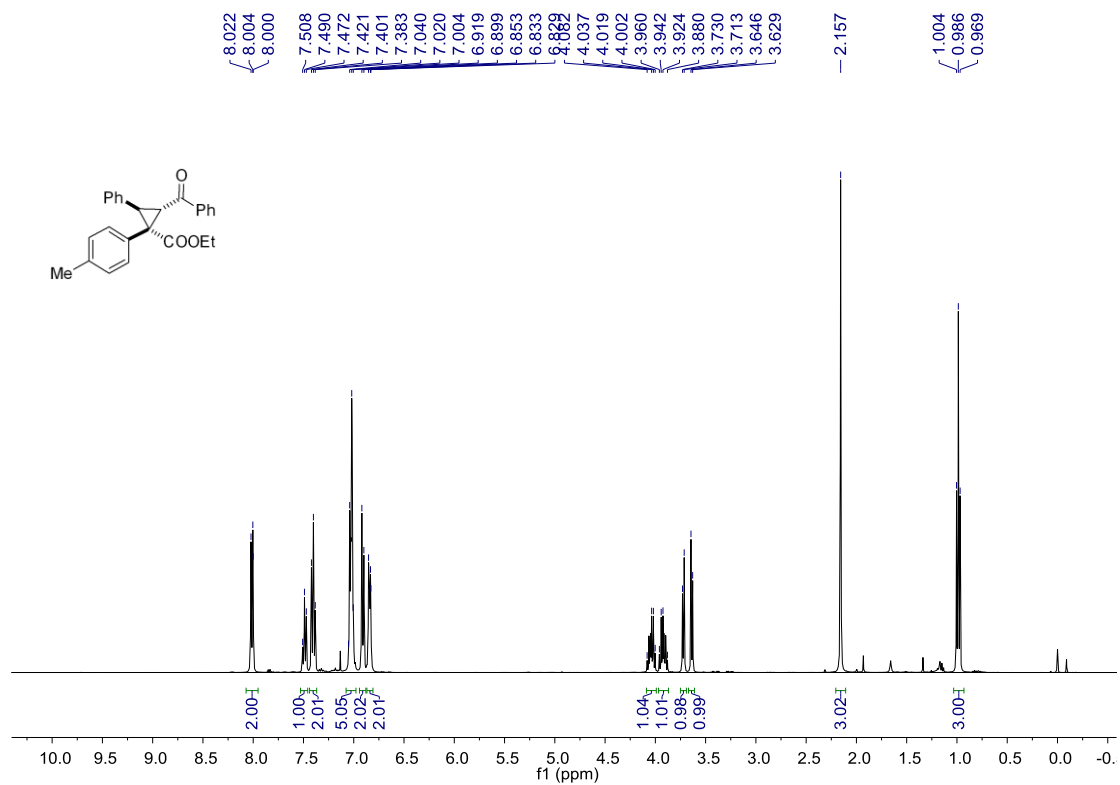

<sup>1</sup>H NMR spectrum of **6fa** (400 MHz, CDCl<sub>3</sub>)

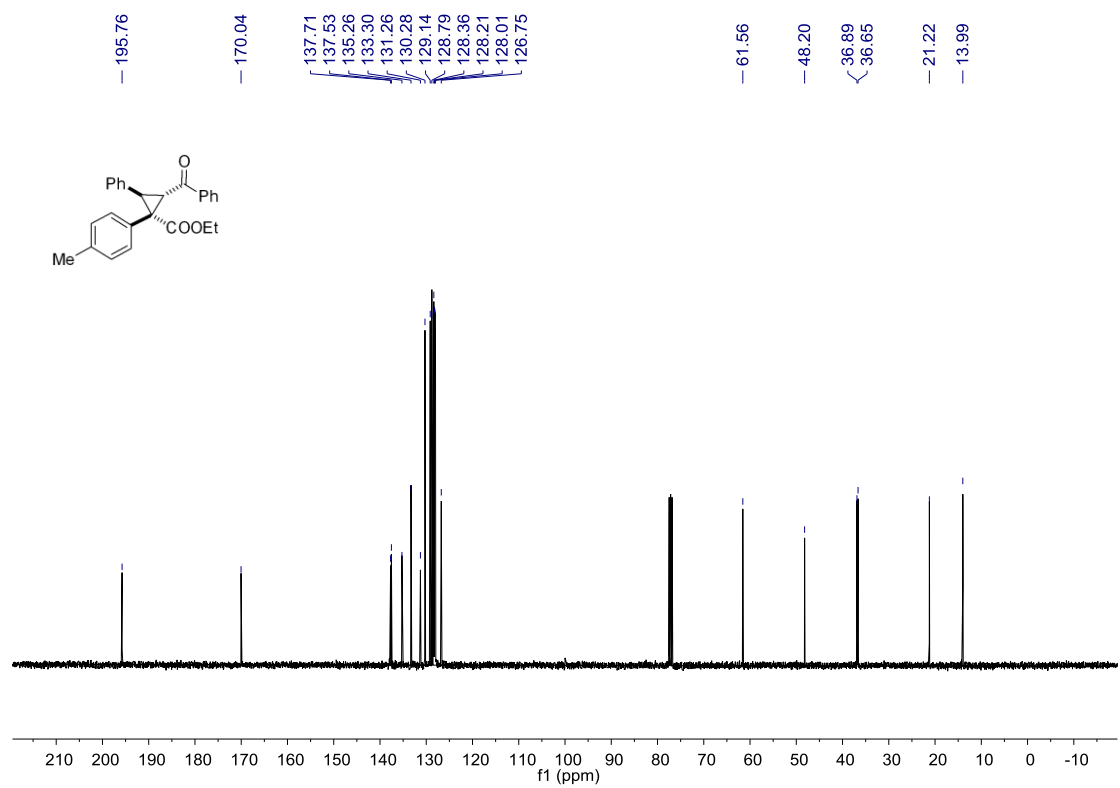

<sup>13</sup>C NMR spectrum of **6fa** (100 MHz, CDCl<sub>3</sub>)

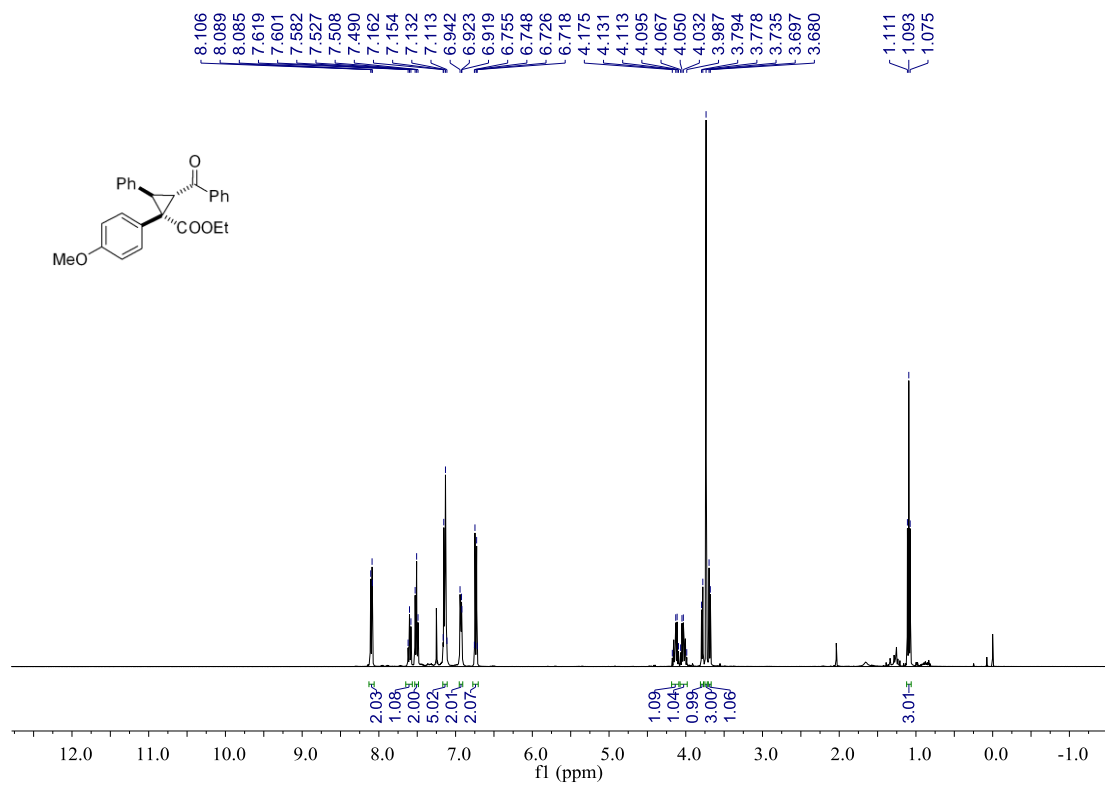

<sup>1</sup>H NMR spectrum of **6ga** (400 MHz, CDCl<sub>3</sub>)

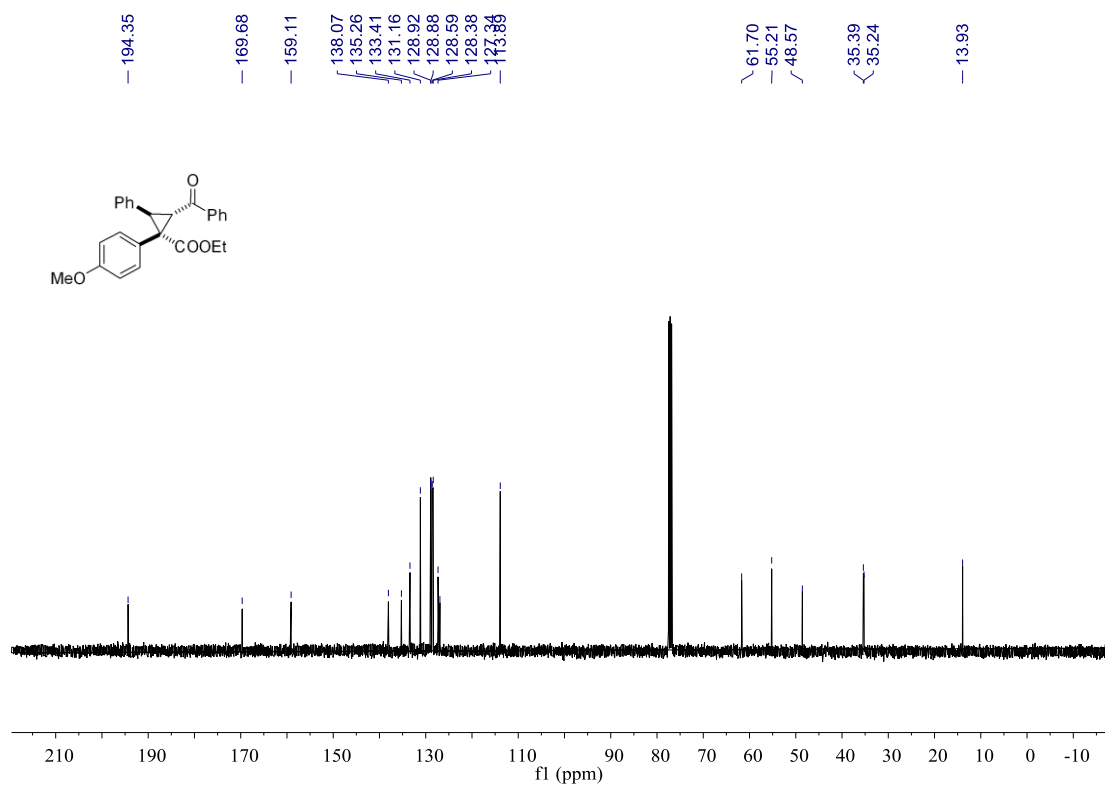

<sup>13</sup>C NMR spectrum of **6ga** (100 MHz, CDCl<sub>3</sub>)

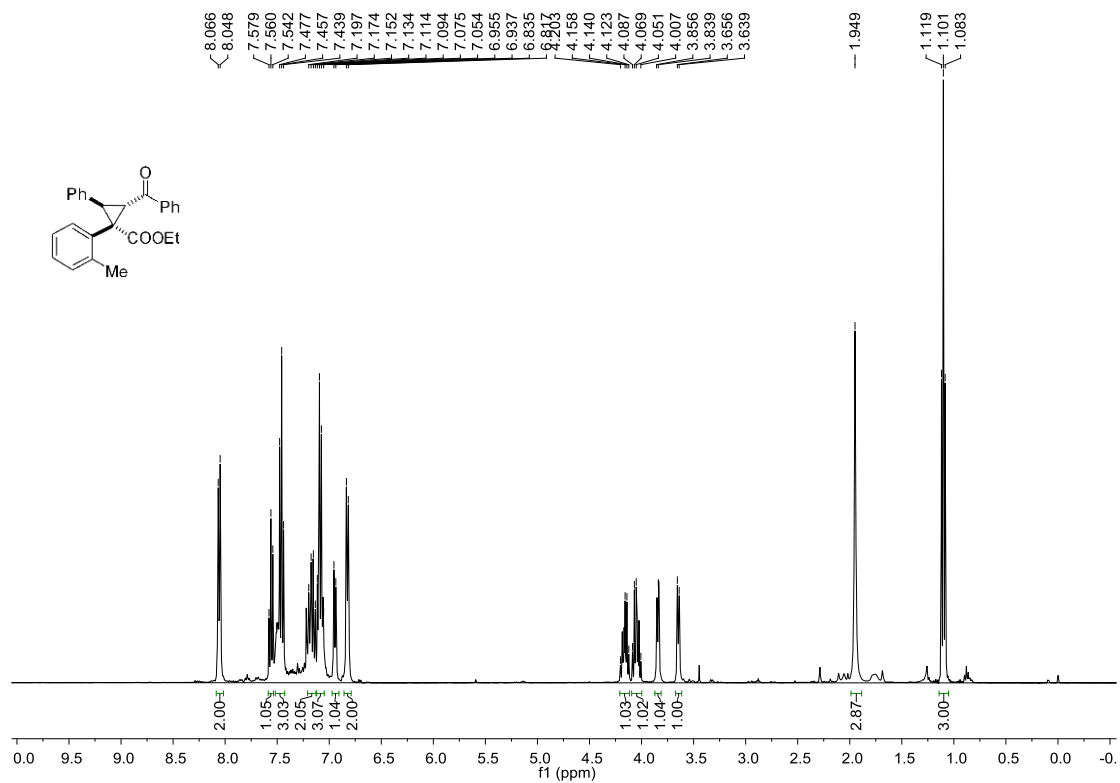

**<sup>1</sup>H NMR spectrum of 6ha (400 MHz, CDCl<sub>3</sub>)**

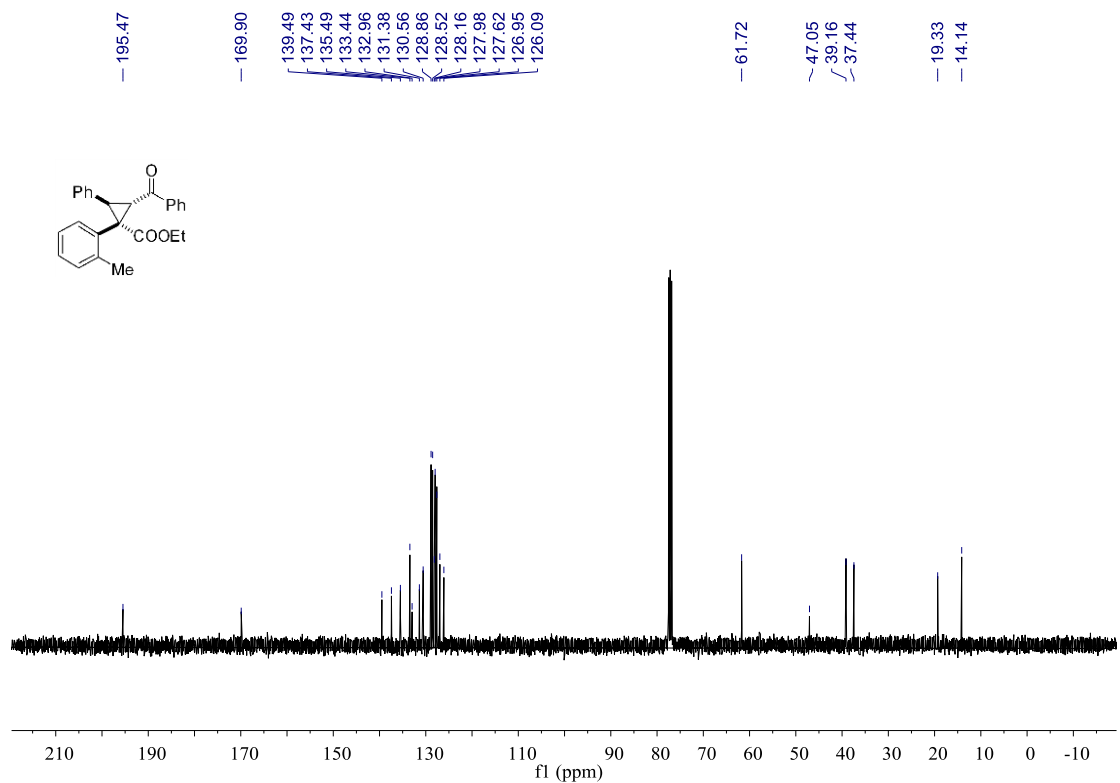

**<sup>13</sup>C NMR spectrum of 6ha (100 MHz, CDCl<sub>3</sub>)**

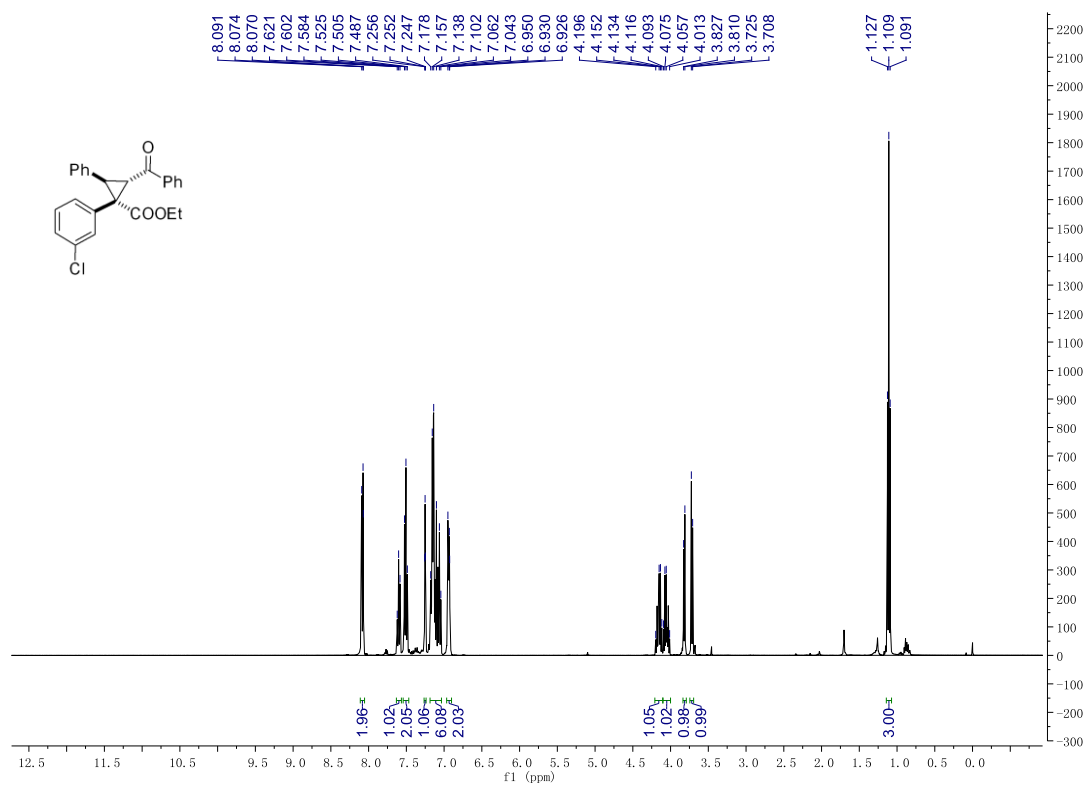

**<sup>1</sup>H NMR spectrum of **6ia** (400 MHz, CDCl<sub>3</sub>)**

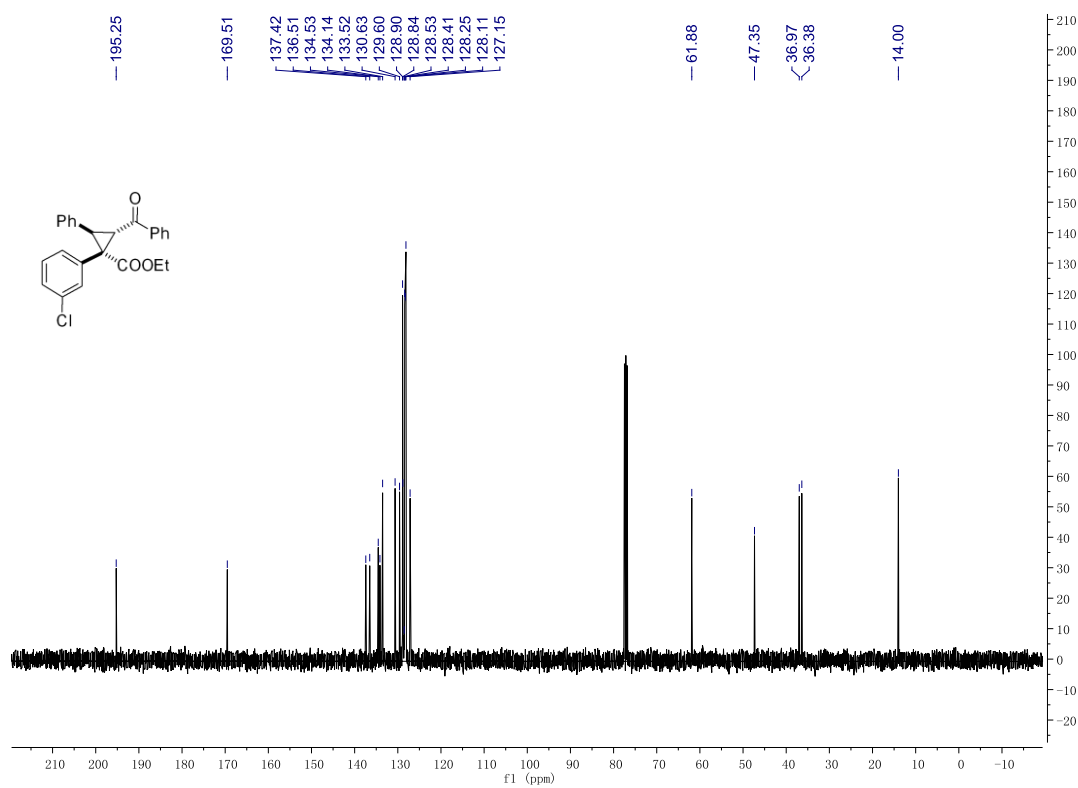

**<sup>13</sup>C NMR spectrum of **6ia** (100 MHz, CDCl<sub>3</sub>)**

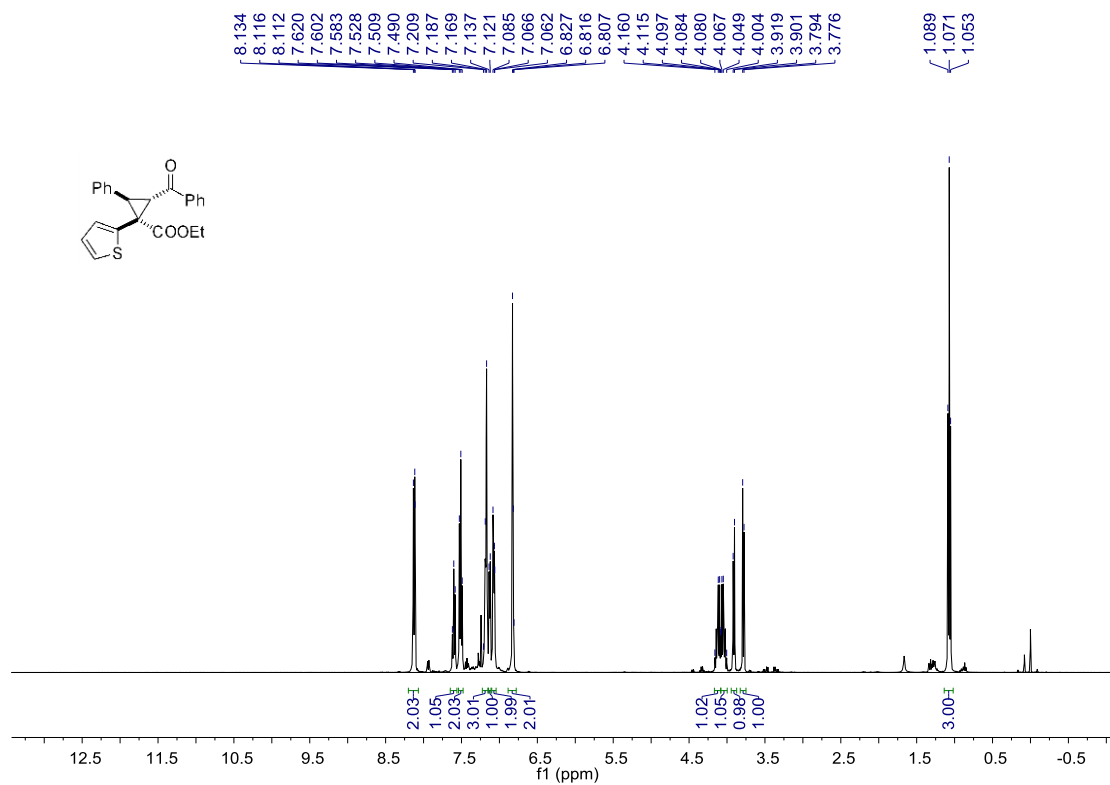

<sup>1</sup>H NMR spectrum of **6ja** (400 MHz, CDCl<sub>3</sub>)

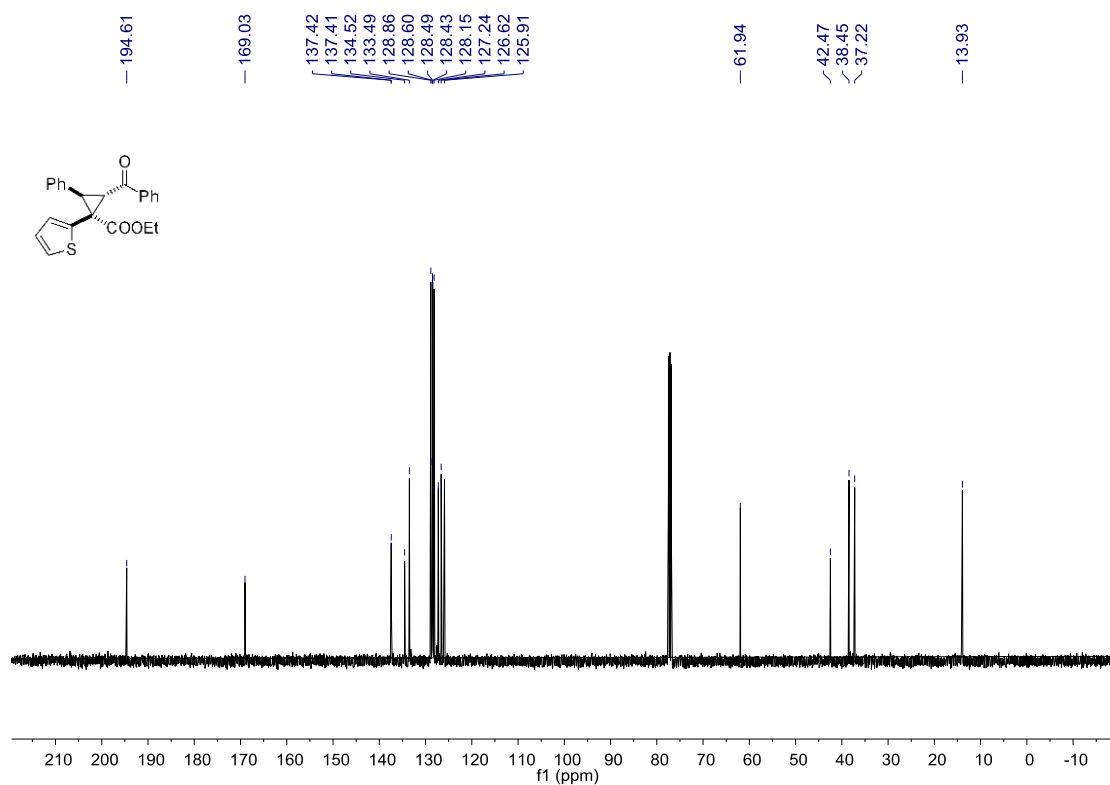

<sup>13</sup>C NMR spectrum of **6ja** (100 MHz, CDCl<sub>3</sub>)

Results of control experiments conducted at 120 °C and 180 °C<sup>a</sup>

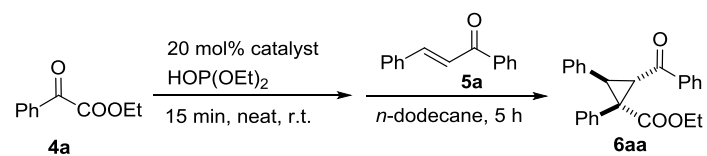

| catalyst                                                                              | GC yield of <b>6aa</b> (%) |        | Isolated yield of <b>6aa</b> (%) |        |
|---------------------------------------------------------------------------------------|----------------------------|--------|----------------------------------|--------|
|                                                                                       | 120 °C                     | 180 °C | 120 °C                           | 180 °C |
| $[(\text{Me}_3\text{Si})_2\text{N}]_3\text{Yb}(\mu\text{-Cl})\text{Li}(\text{THF})_3$ | 80                         | 83     |                                  |        |
| $[(\text{Me}_3\text{Si})_2\text{N}]_3\text{La}(\mu\text{-Cl})\text{Li}(\text{THF})_3$ | 78                         | 89     | 63                               | 80     |

<sup>a</sup> Reactions were conducted under argon by reacting ethyl 2-oxo-2-phenylacetate (0.5 mmol), diethyl phosphite (0.6 mmol), and chalcone (1.0 mmol) in *n*-dodecane (0.5 mL) for 5 h. The catalyst loading is relative to ethyl 2-oxo-2-phenylacetate.
